# Supplementary material for: Kill two birds with one stone: making multi-transgenic pre-diabetes mouse models through insulin resistance and pancreatic apoptosis pathogenesis
Source: PubMed Central journal article supplement (PMC5909684; doi:10.7717/peerj.4542), 2018-04-17
Supplement: peerj-06-4542-s002.pdf [file peerj-06-4542-s002.pdf]

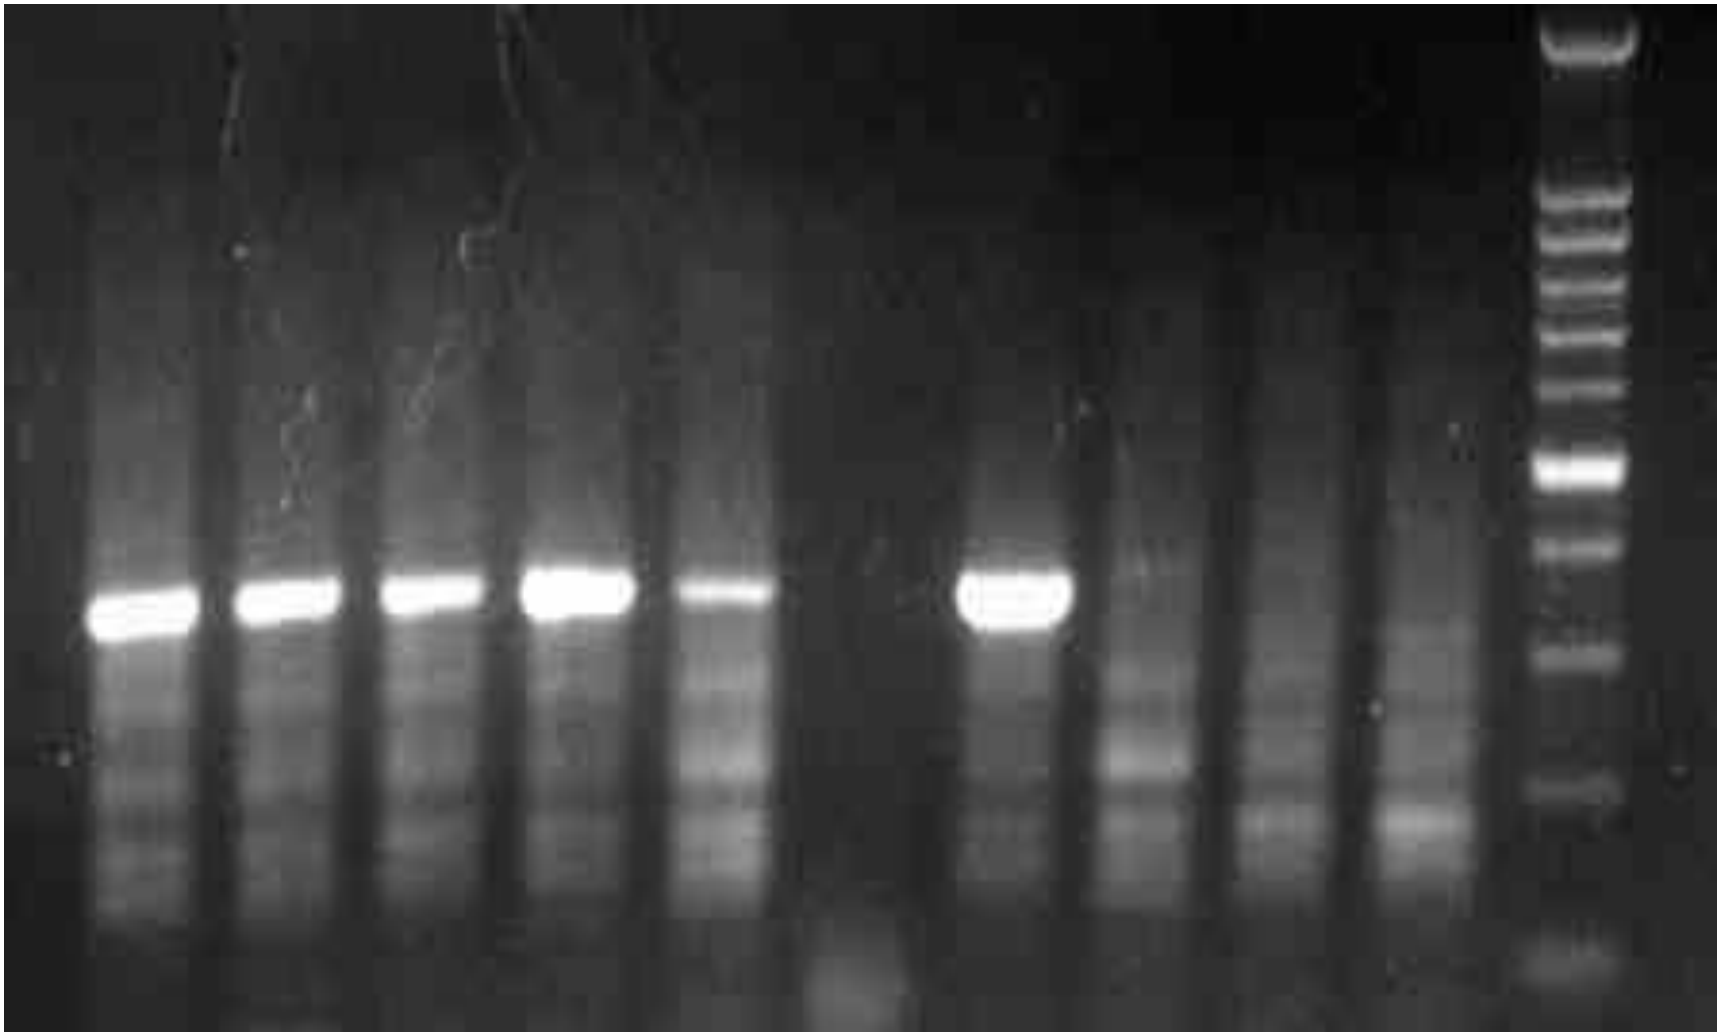

**Fig. S1 Positive PCR of the CHOP (358 bp) transgenic mice.**

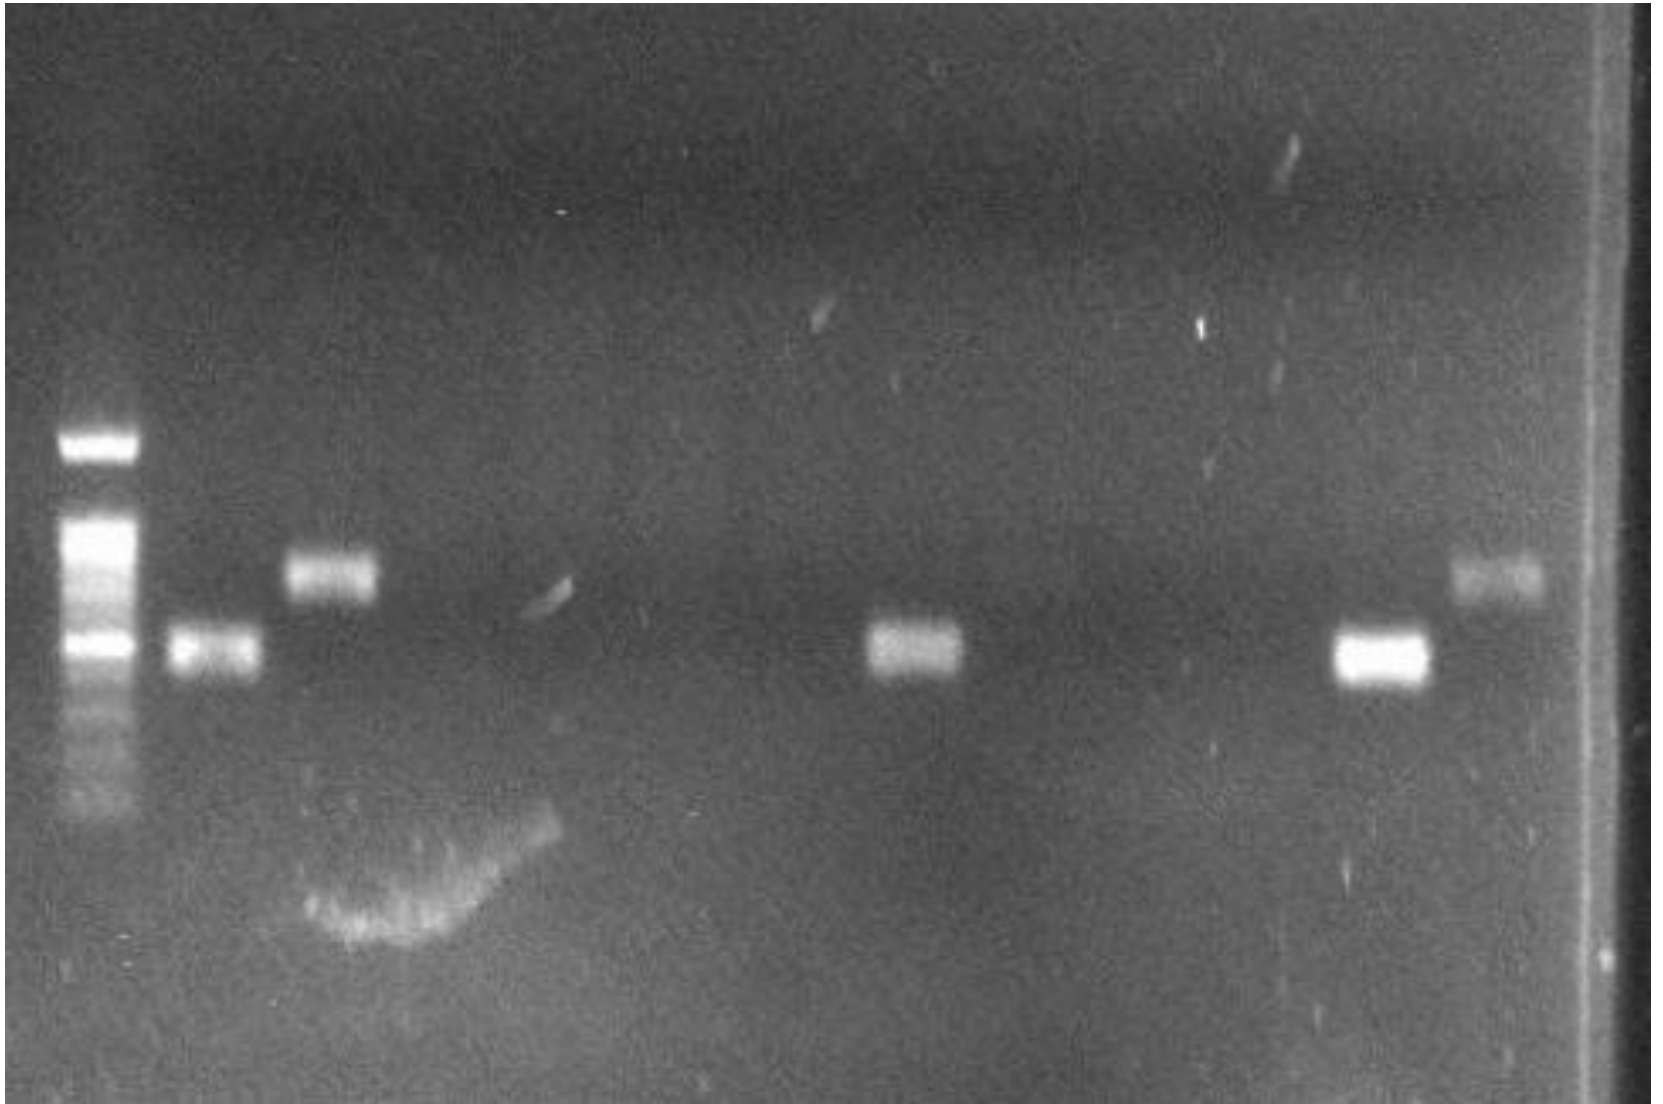

**Fig. S2 Positive PCR of the CHOP (506 bp) and hIAPP (910 bp) transgene mice.**

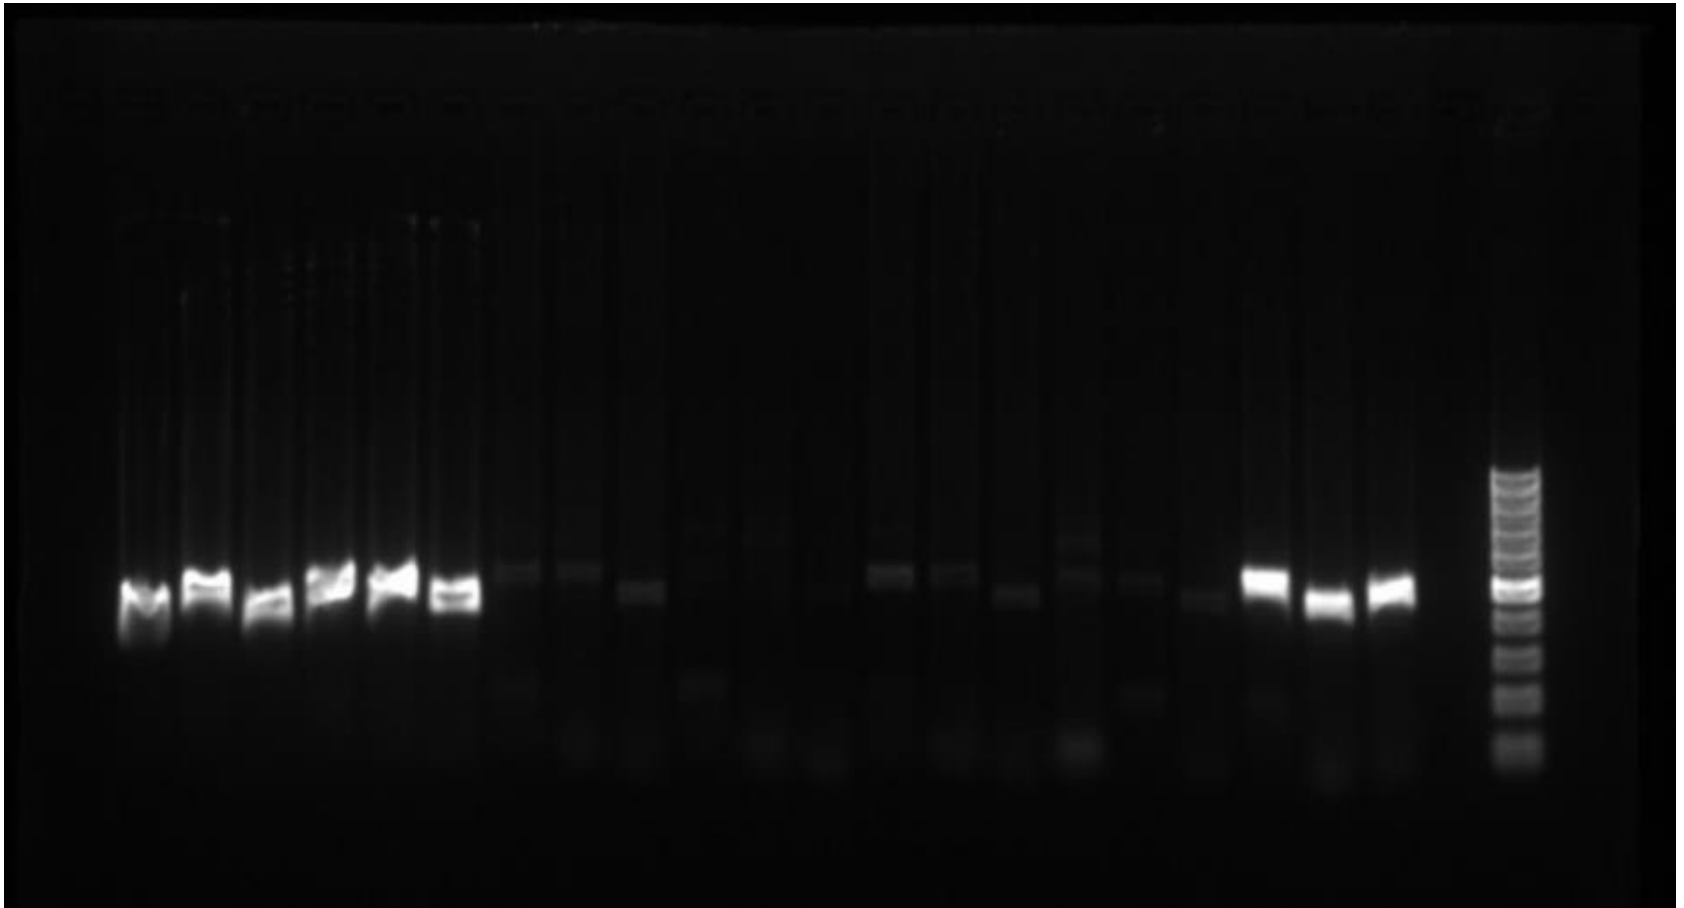

**Fig. S3 Positive PCR of the 11 $\beta$ -HSD1 (513 bp), CHOP (506 bp) and hIAPP (445 bp) transgenic mice**
