# Supplementary material for: Kill two birds with one stone: making multi-transgenic pre-diabetes mouse models through insulin resistance and pancreatic apoptosis pathogenesis
Source: PeerJ. 2018 Apr 17;6:e4542. doi: 10.7717/peerj.4542 (PMC5909684; doi:10.7717/peerj.4542)
Supplement: Supplemental Information 2 [file peerj-06-4542-s003.xlsx]

## Sheet: Fig.2A and 2B
IPGTT raw data without HFHSD diet induction (5-month-old animals)
Triple-Tg IPGTT
Number of mouse	0 min(mmol/l)	15 min	30 min	45 min	60 min	90 min	120 min	Area under the curve (AUC)(mmol/l·min)
6	7.1	14.2	13.4	12.2	11.3	9.2	9.7	1326
12	7.6	18.3	16.1	14.7	11.2	8.7	6.8	1409
16	7.6	19.9	16.6	13.5	12.8	9.4	10.2	1530
27	8.65	23.8	17.9	14.9	14.7	10.8	11	1734
58	5.05	14	15.3	13.5	14.4	9.4	10.9	1449
Average value	7.2	18.04	15.86	13.76	12.88	9.5	9.72	1489.6
Standard deviation(SDV)	1.32806	4.11619	1.66823	1.08995	1.65439	0.781025	1.71668	138.761
Standard error of the mean (SEM)	0.593928	1.84082	0.746056	0.487442	0.739865	0.349285	0.767724	62.0558
T-test(Triple-Tg vs Single-Tg)	0.0067111	0.12979	0.411603	0.357661	0.417478	0.449884	0.0272685	0.221273
T-test(Triple-Tg vs Nc)	0.012607	0.025077	0.0291394	0.0141964	0.0436324	0.0681498	0.0606673	0.0140973
Single-Tg IPGTT
Number of mouse	0 min	15 min	30 min	45 min	60 min	90 min	120 min	Area under the curve (AUC)
86	4.4	15.6	18.3	16.4	15.9	11.7	7.9	1615
89	4.2	13.7	16.9	14.3	11.4	8.9	7.2	1337
87	4.7	15.5	13.4	11.9	10.3	7.5	6.4	1200
Average value	4.43333	14.9333	16.2	14.2	12.5333	9.36667	7.16667	1384
Standard deviation(SDV)	0.20548	0.873053	2.06074	1.83848	2.42258	1.74611	0.612826	172.652
Standard error of the mean (SEM)	0.118634	0.504058	1.18977	1.06145	1.39868	1.00812	0.353815	99.6806
T-test(Single-Tg vs Nc)	0.061715	0.0138313	0.0719108	0.0659758	0.166084	0.255841	0.171658	0.112112
Nc IPGTT
Number of mouse	0 min	15 min	30 min	45 min	60 min	90 min	120 min	Area under the curve (AUC)
85	4.8	10.8	9.4	10.2	8.8	7.2	7.4	1017
84	4.6	13	14.1	12	12.4	9.4	7.4	1293
81	5.1	12	13.7	12.2	9.7	8.5	8.6	1209
Average value	4.83333	11.9333	12.4	11.4667	10.3	8.36667	7.8	1173
Standard deviation(SDV)	0.20548	0.899383	2.1276	0.899383	1.52971	0.903081	0.565685	115.516
Standard error of the mean (SEM)	0.118634	0.519259	1.22837	0.519259	0.883176	0.521394	0.326599	66.6933

## Sheet: Fig.2C and 2D
IPGTT raw data with HFHS diet induction (~11-month-old animals)
Triple-Tg IPGTT
Number of mouse	0 min	15 min	30 min	45 min	60 min	90 min	120 min	Area under the curve (AUC)
2	7.2	25.3	22.7	24.2	23	18.6	17.4	2474
9	8.2	22.2	18.8	18.5	17.6	16.3	13.7	2045
15	7.9	21.9	27	27.2	23	23.2	17.3	2674
18	9.9	21.8	20.9	21.7	19.2	21.2	16.8	2360
Average value	8.3	22.8	22.35	22.9	20.7	19.825	16.3	2388.25
Standard deviation(SDV)	0.992472	1.45086	3.01869	3.20078	2.36854	2.60804	1.51822	227.829
Standard error of the mean (SEM)	0.496236	0.725431	1.50935	1.60039	1.18427	1.30402	0.759111	113.915
T-test(Triple-Tg vs Double-Tg)	0.249654	0.494741	0.306099	0.250378	0.160419	0.0618609	0.108775	0.119039
T-test(Triple-Tg vs Nc HFHSD)	0.259948	0.325779	0.172127	0.108944	0.0347587	0.0050392	0.00858535	0.0247028
Double-Tg HFHSD IPGTT
Number of mouse	0 min	15 min	30 min	45 min	60 min	90 min	120 min	Area under the curve (AUC)
8*1	7.7	20.3	17.6	13.4	10.2	9.1	7.8	1447
8*6	7.2	26.1	25.8	19.2	10.7	8.1	8.9	1738
8*29	10.1	25.1	19.8	12.8	15.3	13.8	9.4	1841
8*11	8.1	21.3	23.4	14.1	14.6	9.6	9.8	1706
1	8.7	24.2	21	24.9	23.2	19.5	19.6	2518
20	8.3	18.6	14.8	15.1	13.3	8.7	9.9	1499
5	7.1	19.7	22	20.3	15.3	12.7	13.2	1907
8*8	8.2	20.3	24.1	22.2	18.3	11.9	10.4	1985
26	8.3	14.2	15.5	22.1	20.1	15.6	18	2030
8*13	6.1	27.9	21.4	16.2	12.1	9.2	6.6	1676
8*10	8.1	30.7	28.6	35	35	35	27.1	3719
2	5.5	21.7	18.8	24.4	15.2	13.8	8.9	1904
55	8.5	25.9	22.9	27.3	19.9	11.4	12	2175
Average value	7.83846	22.7692	21.2077	20.5385	17.1692	13.7231	12.4308	2011.15
Standard deviation(SDV)	1.17085	4.40953	3.94661	6.43254	6.58399	7.15928	5.81225	562.51
Standard error of the mean (SEM)	0.324736	1.22298	1.09459	1.78407	1.82607	1.98563	1.61203	324.765
T-test(Double-Tg vs Nc HFHSD)	0.287167	0.287814	0.20655	0.248773	0.287296	0.288933	0.139659	0.215684
Nc HFHSD IPGTT
Number of mouse	0 min	15 min	30 min	45 min	60 min	90 min	120 min	Area under the curve (AUC)
8*30	4.7	25.1	22.2	14.2	12.1	7.7	5.7	1547
8*28	5.2	25.4	24.5	27.9	21.8	15.7	10.3	2322
8*24	5.6	23.3	21.4	22.2	15.9	14.8	10.2	2000
17	8.4	14.3	11.3	11.1	11.3	6.7	3.7	1124
30	8.8	14.2	15.4	16.9	12.1	11.4	11	1543
15	11.4	26.2	21.8	18	19.6	15.3	15.8	2213
Average value	7.35	21.4167	19.4333	18.3833	15.4667	11.9333	9.45	1791.5
Standard deviation(SDV)	2.61973	5.63184	5.00426	5.96705	4.41392	3.9833	4.26931	422.227
Standard error of the mean (SEM)	1.0695	2.29919	2.04298	2.43604	1.80197	1.62617	1.74294	172.373
Nc ControlD IPGTT
Number of mouse	0 min	15 min	30 min	45 min	60 min	90 min	120 min	Area under the curve (AUC)
8*25	6.4	19.4	20.7	15.4	11.8	8.9	8.8	1545
8*31	6.4	13.1	16.7	19.6	13.3	10.1	7.4	1502
8*22	5.7	14.6	15.3	12.5	10.1	8.7	6.6	1266
8*27	6.6	18.2	20.9	17.3	13.1	12.1	10.1	1705
44	7	22	13	11	10.5	7.4	8.4	1327
Average value	6.42	17.46	17.32	15.16	11.76	9.44	8.26	1469
Standard deviation(SDV)	0.471169	3.60943	3.44122	3.49042	1.45877	1.76862	1.3409	157.438
Standard error of the mean (SEM)	0.210713	1.61419	1.53896	1.56096	0.65238	0.790949	0.599667	70.4085

## Sheet: Fig.2E
Fasting plasma glucose levels raw data of the three kinds of transgenic mice at the time of sacrifice
Types of mice	Fasting plasma glucose levels													Average	SDV	SEM
Triple-Tg HFHSD	9	8	8.6	9.3	5.35									8.05	1.41845	0.63435
Triple-Tg ControlD	8.7	7.8	9.3	6.6	7.8									8.04	0.917824	0.410463
Double-Tg HFHSD	7.7	7.2	10.1	8.1	8.7	8.3	7.1	8.2	8.3	6.1	8.1	5.5	8.5	7.83846	1.12492	0.311997
Double-Tg ControlD	5.9	7.8	7.8	7.6										7.275	0.798044	0.399022
Single-Tg HFHSD	5.5	4.8	6.6	8.8	5									6.14	1.46915	0.657024
Single-Tg ControlD	7.9	5.7	4.2											5.93333	1.5195	0.877285
Nc HFHSD	6.9	5.8	4	5.6	4.6	6.4								5.55	0.992891	0.405346
Nc ControlD	5.4	5.7	7.13											6.07667	0.754822	0.435796
Nc' HFHSD	4.7	5.2	5.6	8.4	8.8									6.54	1.71067	0.765036
Nc' ControlD	6.4	6.4	5.7	6.6	7									6.42	0.421426	0.188468
