# Supplementary material for: Kill two birds with one stone: making multi-transgenic pre-diabetes mouse models through insulin resistance and pancreatic apoptosis pathogenesis
Source: PeerJ. 2018 Apr 17;6:e4542. doi: 10.7717/peerj.4542 (PMC5909684; doi:10.7717/peerj.4542)
Supplement: Supplemental Information 3 [file peerj-06-4542-s004.xlsx]

## Sheet: Fig.3A
The increasing weight trends of triple-transgenic mice during the induction period
Group	Number of mouse	0 day	30 day	60 day	90 day	120 day	190 day
Tg HFHSD	2	29.71	34.43	39.84	44.54	46	51.69
	9	29.47	35.64	42.36	48.58	55.33	51.96
	15	26.07	33.03	37.69	46.12	52.66	56.9
	18	31.08	34.39	42.36	46.04	54.51	56.27
	56	31.03	41.98	45.91	46.34	53.32	56.95
Average		29.472	35.894	41.632	46.324	52.364	54.754
SDV		2.03981	3.52533	3.08674	1.44868	3.70488	2.68889
SEM		0.91223	1.57657	1.38043	0.64787	1.65687	1.20251
T-test(TgHFHSD vs NcHFHSD)		0.0277505	0.172063	0.096773	0.0671	0.001874	0.000379333
Group	Number of mouse	0 day	30 day	60 day	90 day	120 day	190 day
Tg ControlD	6	27.86	29.71	30.78	32.88	38.34	39.47
	12	28.03	26.98	27.64	32.01	35.06	38.13
	16	30	30.8	34.44	40.75	46.18	49.03
	27	26.46	27.78	31.08	35.48	40.36	42.9
	58	27.72	26.17	29.91	32.44	40.22	41.62
Average		28.014	28.288	30.77	34.712	40.032	42.23
SDV		1.27176	1.9227	2.45467	3.63546	4.04736	4.22755
SEM		0.56875	0.859857	1.09776	1.62583	1.81003	1.89062
T-test(TgControlD vs NcControlD)		0.00204279	0.0659568	0.0471922	0.121968	0.0528697	0.047962
		0.0257154	0.0568952	0.0432056	0.0437652	0.0348407	0.0356645
Group	Number of mouse	0 day	30 day	60 day	90 day	120 day	190 day
Nc HFHSD	1	24.75	28.88	31.11	38.63	43.86	48.17
	3	22.5	33.58	34.07	44.65	47.95	50.3
	4	22.76	39.57	44.44	50.05	44.75	41.15
	5	28.65	32	n/a	39.82	45	42.27
	7	30.38	37.92	n/a	44.86	37.2	43.45
	8	26	28.26	n/a	39.32	44.35	45.39
Average		25.84	33.3683	36.54	42.8883	43.8517	45.1217
SDV		3.17375	4.63326	6.99985	4.43985	3.56132	3.54627
SEM		1.29568	1.89152	4.04137	1.81256	1.4539	1.44776
Group	Number of mouse	0 day	30 day	60 day	90 day	120 day	190 day
Nc ControlD	20	22.69	25.48	26.95	28.17	33.31	37.07
	21	25.29	27.64	29.42	34.64	37.6	36.67
	22	23.03	24.99	26.29	31.4	34.4	37.94
Average		23.67	26.0367	27.5533	31.4033	35.1033	37.2267
SDV		1.41322	1.40998	1.64992	3.235	2.22981	0.649333
SEM		0.815925	0.81405	0.952581	1.86773	1.28738	0.374893

## Sheet: Fig.3B and 3C
IPGTT dynamic trends of triple-transgenic mice under HFHS diet induction(raw data)
Tg HFHSD IPGTT (0 day)
Number of mouse	0 min(mmol/l)	15 min	30 min	45 min	60 min	90 min	120 min	Area under the curve (AUC)(mmol/l·min)
2	7.8	17	11.8	10.6	8.7	7.3	6	1154
9	9.6	14.8	12.8	9.8	9.6	7.9	6.8	1188
15	7.4	21	16.1	13.8	12.3	10.3	8.6	1534
18	4.9	22.5	14.9	10.4	10.1	9.1	6.9	1358
56	9.6	18.1	12.5	11.4	9.7	8.5	6.5	1273
Average value	7.86	18.68	13.62	11.2	10.08	8.62	6.96	1301.4
Standard deviation(SDV)	1.93856	3.08982	1.80472	1.56205	1.34239	1.15412	0.981326	136.161
Standard error of the mean (SEM)	0.866949	1.38181	0.807094	0.69857	0.600333	0.51614	0.438862	60.8931
T-test(Tg HFHSD0 vs Tg ControlD0 )	0.125654	0.107998	0.246638	0.197177	0.44667	0.274861	0.478243	0.391484
Tg ControlD IPGTT (0 day)
Number of mouse	0 min	15 min	30 min	45 min	60 min	90 min	120 min	Area under the curve (AUC)
6	7.7	20.3	20	14.4	11.9	8.9	7.4	1524
12	6.75	12.7	11.8	10.8	9.2	7.4	7.7	1125
16	6.6	13.8	12.9	11.7	9.5	8.9	6.8	1208
27	4.8	16.2	15.1	11.7	10.2	7.55	5.8	1224
Average value	6.4625	15.75	14.95	12.15	10.2	8.1875	6.925	1270.25
Standard deviation(SDV)	1.21063	3.367	3.63547	1.55885	1.2083	0.825	0.838153	174.643
Standard error of the mean (SEM)	0.605315	1.6835	1.81774	0.779423	0.604152	0.4125	0.419076	87.3216
Tg HFHSD IPGTT (60 day)
Number of mouse	0 min(mmol/l)	15 min	30 min	45 min	60 min	90 min	120 min	Area under the curve (AUC)(mmol/l·min)
2	9.4	17.7	18.6	18.3	15.8	13.5	11.7	1826
9	8.7	17.4	18.5	22.1	15.7	13.4	12	1871
15	7.7	22.2	21.4	20.6	18.7	16.4	10.1	2085
18	9.275	17.4	23	23	22	19.55	15.6	2336
Average value	8.76875	18.675	20.375	21	18.05	15.7125	12.35	2029.5
Standard deviation(SDV)	0.774966	2.35425	2.20662	2.05426	2.97825	2.91215	2.32164	202.211
Standard error of the mean (SEM)	0.387483	1.17713	1.10331	1.02713	1.48913	1.45608	1.16082	101.105
T-test(Tg HFHSD60 vs Tg ControlD60)	0.0380973	0.396509	0.00493005	0.000121745	0.00631955	0.00118435	0.0452924	0.00207521
T-test(Tg HFHSD60 vs Tg HFHSD0)	0.205659	0.498975	0.000725185	4.00576e-05	0.000501336	0.000745826	0.00104064	0.000378182
Tg ControlD IPGTT (60 day)
Number of mouse	0 min	15 min	30 min	45 min	60 min	90 min	120 min	Area under the curve (AUC)
6	7.1	14.2	13.4	12.2	11.3	9.2	9.7	1326
12	7.6	18.3	16.1	14.7	11.2	8.7	6.8	1409
16	7.6	19.9	16.6	13.5	12.8	9.4	10.2	1530
27	8.65	23.8	17.9	14.9	14.7	10.8	11	1734
58	5.05	14	15.3	13.5	14.4	9.4	10.9	1449
Average value	7.2	18.04	15.86	13.76	12.88	9.5	9.72	1489.6
Standard deviation(SDV)	1.32806	3.68163	1.49211	0.974885	1.47973	0.69857	1.53545	138.761
Standard error of the mean (SEM)	0.593928	1.64648	0.667293	0.435982	0.661755	0.31241	0.686673	62.0558
T-test(Tg ControlD60 vs Tg ControlD0)	0.209251	0.200195	0.314983	0.0549835	0.0153235	0.0222098	0.0105939	0.0430331
Tg HFHSD IPGTT (190 day)
Number of mouse	0 min(mmol/l)	15 min	30 min	45 min	60 min	90 min	120 min	Area under the curve (AUC)(mmol/l·min)
2	7.2	25.3	22.7	24.2	23	18.6	17.4	2474
9	8.2	22.2	18.8	18.5	17.6	16.3	13.7	2045
15	7.9	21.9	27	27.2	23	23.2	17.3	2674
18	9.9	21.8	20.9	21.7	19.2	21.2	16.8	2360
Average value	8.3	22.8	22.35	22.9	20.7	19.825	16.3	2388.25
Standard deviation(SDV)	1.14601	1.67531	3.48569	3.69594	2.73496	3.01151	1.75309	227.829
Standard error of the mean (SEM)	0.573004	0.837655	1.74284	1.84797	1.36748	1.50575	0.876546	113.915
T-test(Tg HFHSD190 vs Tg ControlD190)	0.257592	0.0396673	0.0214706	0.00139235	0.000341652	0.000430066	0.00085482	0.000564664
T-test(Tg HFHSD190 vs Tg HFHSD0)	0.351097	0.0244346	0.000881596	0.000170534	5.84822e-05	5.58877e-05	9.45557e-06	5.26017e-05
T-test(Tg HFHSD190 vs Tg HFHSD60)	0.261623	0.0144922	0.18765	0.201725	0.118939	0.0486206	0.0174243	0.0437338
T-test(Tg HFHSD190 vs Nc HFHSD190)	0.259948	0.325779	0.172127	0.108944	0.0347587	0.0050392	0.00858535	0.0247028
Tg ControlD IPGTT (190 day)
Number of mouse	0 min	15 min	30 min	45 min	60 min	90 min	120 min	Area under the curve (AUC)
6	6.7	17.7	16.5	13.6	11.5	9	8.8	1428
12	7.2	16.1	20.1	14.6	14.4	11.4	11.7	1658
16	9.3	24.8	19.9	17.6	13.8	12.3	12.9	1877
27	8.4	17.5	12	13.1	12	9.8	9.2	1404
58	7.4	18.7	13.9	12.7	12.9	13	10.3	1570
Average value	7.8	18.96	16.48	14.32	12.92	11.1	10.58	1587.4
Standard deviation(SDV)	1.04163	3.39382	3.58915	1.96647	1.20706	1.67631	1.71668	192.483
Standard error of the mean (SEM)	0.465833	1.51776	1.60512	0.879432	0.539815	0.749667	0.767724	86.0811
T-test(Tg ControlD190 vs Tg ControlD0)	0.0587448	0.100024	0.273745	0.0579442	0.00606123	0.00805411	0.00307709	0.0189161
T-test(Tg ControlD190 vs Tg ControlD60)	0.224806	0.354919	0.367587	0.2964	0.483117	0.0445427	0.225575	0.201092
T-test(Tg ControlD190 vs Nc ControlD190)	0.0135549	0.258751	0.357721	0.325847	0.10396	0.0830982	0.0222199	0.169903
Nc HFHSD IPGTT (190 day)
Number of mouse	0 min(mmol/l)	15 min	30 min	45 min	60 min	90 min	120 min	Area under the curve (AUC)(mmol/l·min)
8*30	4.7	25.1	22.2	14.2	12.1	7.7	5.7	1547
8*28	5.2	25.4	24.5	27.9	21.8	15.7	10.3	2322
8*24	5.6	23.3	21.4	22.2	15.9	14.8	10.2	2000
17	8.4	14.3	11.3	11.1	11.3	6.7	3.7	1124
30	8.8	14.2	15.4	16.9	12.1	11.4	11	1543
15	11.4	26.2	21.8	18	19.6	15.3	15.8	2213
Average value	7.35	21.4167	19.4333	18.3833	15.4667	11.9333	9.45	1791.5
Standard deviation(SDV)	2.61973	5.63184	5.00426	5.96705	4.41392	3.9833	4.26931	422.227
Standard error of the mean (SEM)	1.0695	2.29919	2.04298	2.43604	1.80197	1.62617	1.74294	172.373
T-test(Nc HFHSD190 vs Nc ControlD190)	0.228669	0.104922	0.222984	0.158275	0.0540195	0.114778	0.283391	0.0888176
Nc ControlD IPGTT (190 day)
Number of mouse	0 min	15 min	30 min	45 min	60 min	90 min	120 min	Area under the curve (AUC)
8*25	6.4	19.4	20.7	15.4	11.8	8.9	8.8	1545
8*31	6.4	13.1	16.7	19.6	13.3	10.1	7.4	1502
8*22	5.7	14.6	15.3	12.5	10.1	8.7	6.6	1266
8*27	6.6	18.2	20.9	17.3	13.1	12.1	10.1	1705
44	7	22	13	11	10.5	7.4	8.4	1327
Average value	6.42	17.46	17.32	15.16	11.76	9.44	8.26	1469
Standard deviation(SDV)	0.421426	3.22837	3.07792	3.12192	1.30476	1.5819	1.19933	157.438
Standard error of the mean (SEM)	0.188468	1.44377	1.37649	1.39617	0.583507	0.707446	0.536358	70.4085
