# Supplementary material for: Kill two birds with one stone: making multi-transgenic pre-diabetes mouse models through insulin resistance and pancreatic apoptosis pathogenesis
Source: PeerJ. 2018 Apr 17;6:e4542. doi: 10.7717/peerj.4542 (PMC5909684; doi:10.7717/peerj.4542)
Supplement: Supplemental Information 5 [file peerj-06-4542-s006.xlsx]

## Sheet: Lipid vacuoles & area
Vacuole Number	Mouse Number	Tissue Section Number	Picture Number	Coordinate	Area(piexls)
1	1	1 Liver-1-40	1-40	1633	70178
2	1	1 Liver-1-40	1-40	4668	51039
3	1	1 Liver-1-40	1-40	3179	45773
4	1	1 Liver-1-40	1-40	200	45755
5	1	1 Liver-1-40	1-40	1709	45248
6	1	1 Liver-1-40	1-40	3272	45078
7	1	1 Liver-1-40	1-40	5266	44608
8	1	1 Liver-1-40	1-40	5192	44547
9	1	1 Liver-1-40	1-40	7074	43249
10	1	1 Liver-1-40	1-40	2838	41473
11	1	1 Liver-1-40	1-40	259	39574
12	1	1 Liver-1-40	1-40	869	39116
13	1	1 Liver-1-40	1-40	1774	38283
14	1	1 Liver-1-40	1-40	866	38125
15	1	1 Liver-1-40	1-40	1245	37549
16	1	1 Liver-1-40	1-40	3743	36976
17	1	1 Liver-1-40	1-40	818	35679
18	1	1 Liver-1-40	1-40	901	34425
19	1	1 Liver-1-40	1-40	6429	33570
20	1	1 Liver-1-40	1-40	1186	33391
21	1	1 Liver-1-40	1-40	462	33010
22	1	1 Liver-1-40	1-40	3197	32770
23	1	1 Liver-1-40	1-40	3632	32305
24	1	1 Liver-1-40	1-40	6027	32215
25	1	1 Liver-1-40	1-40	385	31986
26	1	1 Liver-1-40	1-40	86	31983
27	1	1 Liver-1-40	1-40	1757	31131
28	1	1 Liver-1-40	1-40	773	30109
29	1	1 Liver-1-40	1-40	2221	30015
30	1	1 Liver-1-40	1-40	4465	28698
31	1	1 Liver-1-40	1-40	3580	27773
32	1	1 Liver-1-40	1-40	6786	27759
33	1	1 Liver-1-40	1-40	1239	27572
34	1	1 Liver-1-40	1-40	1868	27011
35	1	1 Liver-1-40	1-40	3342	26687
36	1	1 Liver-1-40	1-40	5142	26665
37	1	1 Liver-1-40	1-40	4234	26164
38	1	1 Liver-1-40	1-40	424	25817
39	1	1 Liver-1-40	1-40	1669	25712
40	1	1 Liver-1-40	1-40	5440	24586
41	1	1 Liver-1-40	1-40	5546	24203
42	1	1 Liver-1-40	1-40	7045	23833
43	1	1 Liver-1-40	1-40	279	23688
44	1	1 Liver-1-40	1-40	2334	23493
45	1	1 Liver-1-40	1-40	171	22641
46	1	1 Liver-1-40	1-40	986	21852
47	1	1 Liver-1-40	1-40	2623	20881
48	1	1 Liver-1-40	1-40	2622	20804
49	1	1 Liver-1-40	1-40	4274	20516
50	1	1 Liver-1-40	1-40	3708	20441
51	1	1 Liver-1-40	1-40	3918	19673
52	1	1 Liver-1-40	1-40	524	19502
53	1	1 Liver-1-40	1-40	5707	18047
54	1	1 Liver-1-40	1-40	4306	17914
55	1	1 Liver-1-40	1-40	707	17422
56	1	1 Liver-1-40	1-40	4923	17240
57	1	1 Liver-1-40	1-40	2144	17131
58	1	1 Liver-1-40	1-40	2905	16553
59	1	1 Liver-1-40	1-40	1334	16458
60	1	1 Liver-1-40	1-40	5551	16439
61	1	1 Liver-1-40	1-40	3787	15983
62	1	1 Liver-1-40	1-40	6068	15874
63	1	1 Liver-1-40	1-40	3926	15712
64	1	1 Liver-1-40	1-40	5640	15603
65	1	1 Liver-1-40	1-40	5252	15527
66	1	1 Liver-1-40	1-40	6579	14994
67	1	1 Liver-1-40	1-40	1624	14463
68	1	1 Liver-1-40	1-40	4709	13815
69	1	1 Liver-1-40	1-40	2320	13509
70	1	1 Liver-1-40	1-40	3404	13493
71	1	1 Liver-1-40	1-40	4346	13477
72	1	1 Liver-1-40	1-40	4281	13441
73	1	1 Liver-1-40	1-40	3154	13427
74	1	1 Liver-1-40	1-40	6546	13180
75	1	1 Liver-1-40	1-40	3964	12728
76	1	1 Liver-1-40	1-40	6243	12522
77	1	1 Liver-1-40	1-40	2286	12337
78	1	1 Liver-1-40	1-40	1969	12300
79	1	1 Liver-1-40	1-40	6519	11987
80	1	1 Liver-1-40	1-40	6183	11841
81	1	1 Liver-1-40	1-40	3475	11680
82	1	1 Liver-1-40	1-40	2328	11609
83	1	1 Liver-1-40	1-40	5933	11358
84	1	1 Liver-1-40	1-40	3772	11277
85	1	1 Liver-1-40	1-40	3685	11086
86	1	1 Liver-1-40	1-40	3893	11046
87	1	1 Liver-1-40	1-40	4718	10854
88	1	1 Liver-1-40	1-40	1302	10692
89	1	1 Liver-1-40	1-40	2185	10624
90	1	1 Liver-1-40	1-40	505	10470
91	1	1 Liver-1-40	1-40	4778	10353
92	1	1 Liver-1-40	1-40	1676	10330
93	1	1 Liver-1-40	1-40	6728	10319
94	1	1 Liver-1-40	1-40	7107	10265
95	1	1 Liver-1-40	1-40	4287	10040
96	1	1 Liver-1-40	1-40	3203	9908
97	1	1 Liver-1-40	1-40	5115	9757
98	1	1 Liver-1-40	1-40	5641	9739
99	1	1 Liver-1-40	1-40	5672	9695
100	1	1 Liver-1-40	1-40	4216	9308
101	1	1 Liver-1-40	1-40	2456	9216
102	1	1 Liver-1-40	1-40	6129	9192
103	1	1 Liver-1-40	1-40	6343	9165
104	1	1 Liver-1-40	1-40	6817	8981
105	1	1 Liver-1-40	1-40	273	8953
106	1	1 Liver-1-40	1-40	356	8766
107	1	1 Liver-1-40	1-40	3973	8469
108	1	1 Liver-1-40	1-40	1002	8265
109	1	1 Liver-1-40	1-40	2020	8188
110	1	1 Liver-1-40	1-40	5169	7536
111	1	1 Liver-1-40	1-40	5860	7511
112	1	1 Liver-1-40	1-40	983	7509
113	1	1 Liver-1-40	1-40	2734	7353
114	1	1 Liver-1-40	1-40	2508	7179
115	1	1 Liver-1-40	1-40	4850	7074
116	1	1 Liver-1-40	1-40	914	6909
117	1	1 Liver-1-40	1-40	1459	6748
118	1	1 Liver-1-40	1-40	832	6576
119	1	1 Liver-1-40	1-40	4721	6540
120	1	1 Liver-1-40	1-40	2211	6140
121	1	1 Liver-1-40	1-40	3394	5994
122	1	1 Liver-1-40	1-40	5673	5924
123	1	1 Liver-1-40	1-40	3314	5899
124	1	1 Liver-1-40	1-40	5693	5873
125	1	1 Liver-1-40	1-40	3458	5403
126	1	1 Liver-1-40	1-40	1342	5217
127	1	1 Liver-1-40	1-40	5176	5179
128	1	1 Liver-1-40	1-40	1810	5119
129	1	1 Liver-1-40	1-40	4866	5072
130	1	1 Liver-1-40	1-40	3241	5058
131	1	1 Liver-1-40	1-40	4697	5029
132	1	1 Liver-1-40	1-40	109	4813
133	1	1 Liver-1-40	1-40	6388	4695
134	1	1 Liver-1-40	1-40	2570	4577
135	1	1 Liver-1-40	1-40	5499	4468
136	1	1 Liver-1-40	1-40	6875	4467
137	1	1 Liver-1-40	1-40	2478	4407
138	1	1 Liver-1-40	1-40	6651	4315
139	1	1 Liver-1-40	1-40	6660	4278
140	1	1 Liver-1-40	1-40	483	4264
141	1	1 Liver-1-40	1-40	5299	4202
142	1	1 Liver-1-40	1-40	7236	4108
143	1	1 Liver-1-40	1-40	1529	4017
144	1	1 Liver-1-40	1-40	67	3848
145	1	1 Liver-1-40	1-40	4422	3799
146	1	1 Liver-1-40	1-40	3680	3736
147	1	1 Liver-1-40	1-40	6569	3711
148	1	1 Liver-1-40	1-40	4197	3666
149	1	1 Liver-1-40	1-40	544	3519
150	1	1 Liver-1-40	1-40	7178	3500
151	1	1 Liver-1-40	1-40	6467	3421
152	1	1 Liver-1-40	1-40	3391	3396
153	1	1 Liver-1-40	1-40	6727	3277
154	1	1 Liver-1-40	1-40	4414	3264
155	1	1 Liver-1-40	1-40	6934	3259
156	1	1 Liver-1-40	1-40	5120	3188
157	1	1 Liver-1-40	1-40	5424	3101
158	1	1 Liver-1-40	1-40	3993	3095
159	1	1 Liver-1-40	1-40	5473	3049
160	1	1 Liver-1-40	1-40	6672	2924
161	1	1 Liver-1-40	1-40	5180	2889
162	1	1 Liver-1-40	1-40	4266	2787
163	1	1 Liver-1-40	1-40	5015	2786
164	1	1 Liver-1-40	1-40	4757	2761
165	1	1 Liver-1-40	1-40	741	2736
166	1	1 Liver-1-40	1-40	4543	2707
167	1	1 Liver-1-40	1-40	4497	2617
168	1	1 Liver-1-40	1-40	6697	2578
169	1	1 Liver-1-40	1-40	81	2417
170	1	1 Liver-1-40	1-40	5139	2373
171	1	1 Liver-1-40	1-40	6276	2338
172	1	1 Liver-1-40	1-40	72	2275
173	1	1 Liver-1-40	1-40	2784	2243
174	1	1 Liver-1-40	1-40	4549	2188
175	1	1 Liver-1-40	1-40	2528	2155
176	1	1 Liver-1-40	1-40	7103	2146
177	1	1 Liver-1-40	1-40	4396	2124
178	1	1 Liver-1-40	1-40	494	2122
179	1	1 Liver-1-40	1-40	5870	2089
180	1	1 Liver-1-40	1-40	12	2088
181	1	1 Liver-1-40	1-40	5601	2078
182	1	1 Liver-1-40	1-40	7021	2045
183	1	1 Liver-1-40	1-40	6029	1986
184	1	1 Liver-1-40	1-40	6966	1944
185	1	1 Liver-1-40	1-40	5089	1940
186	1	1 Liver-1-40	1-40	2484	1938
187	1	1 Liver-1-40	1-40	4399	1922
188	1	1 Liver-1-40	1-40	5087	1885
189	1	1 Liver-1-40	1-40	6215	1859
190	1	1 Liver-1-40	1-40	6642	1858
191	1	1 Liver-1-40	1-40	5136	1775
192	1	1 Liver-1-40	1-40	2925	1766
193	1	1 Liver-1-40	1-40	3464	1749
194	1	1 Liver-1-40	1-40	3915	1730
195	1	1 Liver-1-40	1-40	2117	1722
196	1	1 Liver-1-40	1-40	1339	1716
197	1	1 Liver-1-40	1-40	1748	1701
198	1	1 Liver-1-40	1-40	2969	1679
199	1	1 Liver-1-40	1-40	6480	1642
200	1	1 Liver-1-40	1-40	2251	1635
201	1	1 Liver-1-40	1-40	2564	1535
202	1	1 Liver-1-40	1-40	2002	1523
203	1	1 Liver-1-40	1-40	203	1521
204	1	1 Liver-1-40	1-40	4129	1456
205	1	1 Liver-1-40	1-40	4347	1450
206	1	1 Liver-1-40	1-40	3014	1428
207	1	1 Liver-1-40	1-40	2632	1412
208	1	1 Liver-1-40	1-40	5771	1398
209	1	1 Liver-1-40	1-40	5563	1378
210	1	1 Liver-1-40	1-40	6900	1366
211	1	1 Liver-1-40	1-40	241	1355
212	1	1 Liver-1-40	1-40	6549	1352
213	1	1 Liver-1-40	1-40	6047	1350
214	1	1 Liver-1-40	1-40	5409	1342
215	1	1 Liver-1-40	1-40	4973	1334
216	1	1 Liver-1-40	1-40	5386	1320
217	1	1 Liver-1-40	1-40	3459	1276
218	1	1 Liver-1-40	1-40	3145	1268
219	1	1 Liver-1-40	1-40	7148	1263
220	1	1 Liver-1-40	1-40	4499	1257
221	1	1 Liver-1-40	1-40	2607	1254
222	1	1 Liver-1-40	1-40	7116	1250
223	1	1 Liver-1-40	1-40	5429	1248
224	1	1 Liver-1-40	1-40	6886	1235
225	1	1 Liver-1-40	1-40	3956	1208
226	1	1 Liver-1-40	1-40	6933	1206
227	1	1 Liver-1-40	1-40	6813	1164
228	1	1 Liver-1-40	1-40	315	1162
229	1	1 Liver-1-40	1-40	844	1155
230	1	1 Liver-1-40	1-40	7269	1153
231	1	1 Liver-1-40	1-40	8	1150
232	1	1 Liver-1-40	1-40	4843	1147
233	1	1 Liver-1-40	1-40	7071	1147
234	1	1 Liver-1-40	1-40	1124	1138
235	1	1 Liver-1-40	1-40	5679	1126
236	1	1 Liver-1-40	1-40	5058	1122
237	1	1 Liver-1-40	1-40	3072	1115
238	1	1 Liver-1-40	1-40	6472	1111
239	1	1 Liver-1-40	1-40	4682	1102
240	1	1 Liver-1-40	1-40	5621	1102
241	1	1 Liver-1-40	1-40	647	1098
242	1	1 Liver-1-40	1-40	6380	1075
243	1	1 Liver-1-40	1-40	6037	1063
244	1	1 Liver-1-40	1-40	2212	1061
245	1	1 Liver-1-40	1-40	2339	1058
246	1	1 Liver-1-40	1-40	4954	1056
247	1	1 Liver-1-40	1-40	2972	1055
248	1	1 Liver-1-40	1-40	2187	1053
249	1	1 Liver-1-40	1-40	3576	1050
250	1	1 Liver-1-40	1-40	5500	1049
251	1	1 Liver-1-40	1-40	1123	1042
252	1	1 Liver-1-40	1-40	793	1040
253	1	1 Liver-1-40	1-40	1841	1025
254	1	1 Liver-1-40	1-40	2157	1021
255	1	1 Liver-1-40	1-40	6101	1011
256	2	2 Liver-1-40	1-40	77	64454
257	2	2 Liver-1-40	1-40	71	40351
258	2	2 Liver-1-40	1-40	82	35899
259	2	2 Liver-1-40	1-40	4	32012
260	2	2 Liver-1-40	1-40	52	29824
261	2	2 Liver-1-40	1-40	88	26321
262	2	2 Liver-1-40	1-40	70	25017
263	2	2 Liver-1-40	1-40	9	24315
264	2	2 Liver-1-40	1-40	93	22698
265	2	2 Liver-1-40	1-40	100	22501
266	2	2 Liver-1-40	1-40	81	21981
267	2	2 Liver-1-40	1-40	62	20571
268	2	2 Liver-1-40	1-40	27	20347
269	2	2 Liver-1-40	1-40	97	20260
270	2	2 Liver-1-40	1-40	8	17473
271	2	2 Liver-1-40	1-40	41	16865
272	2	2 Liver-1-40	1-40	53	15476
273	2	2 Liver-1-40	1-40	18	15321
274	2	2 Liver-1-40	1-40	22	14648
275	2	2 Liver-1-40	1-40	63	14614
276	2	2 Liver-1-40	1-40	89	14259
277	2	2 Liver-1-40	1-40	46	13296
278	2	2 Liver-1-40	1-40	72	13062
279	2	2 Liver-1-40	1-40	80	13005
280	2	2 Liver-1-40	1-40	1	12136
281	2	2 Liver-1-40	1-40	12	10722
282	2	2 Liver-1-40	1-40	61	9445
283	2	2 Liver-1-40	1-40	13	9317
284	2	2 Liver-1-40	1-40	17	8170
285	2	2 Liver-1-40	1-40	85	8000
286	2	2 Liver-1-40	1-40	36	7578
287	2	2 Liver-1-40	1-40	90	6880
288	2	2 Liver-1-40	1-40	68	6583
289	2	2 Liver-1-40	1-40	11	6385
290	2	2 Liver-1-40	1-40	74	6127
291	2	2 Liver-1-40	1-40	48	6081
292	2	2 Liver-1-40	1-40	39	5570
293	2	2 Liver-1-40	1-40	49	5424
294	2	2 Liver-1-40	1-40	23	5312
295	2	2 Liver-1-40	1-40	98	4409
296	2	2 Liver-1-40	1-40	91	4399
297	2	2 Liver-1-40	1-40	32	4151
298	2	2 Liver-1-40	1-40	55	3840
299	2	2 Liver-1-40	1-40	45	3204
300	2	2 Liver-1-40	1-40	99	2978
301	2	2 Liver-1-40	1-40	86	2843
302	2	2 Liver-1-40	1-40	57	2834
303	2	2 Liver-1-40	1-40	25	2681
304	2	2 Liver-1-40	1-40	37	2665
305	2	2 Liver-1-40	1-40	96	2587
306	2	2 Liver-1-40	1-40	54	2569
307	2	2 Liver-1-40	1-40	29	2535
308	2	2 Liver-1-40	1-40	94	2333
309	2	2 Liver-1-40	1-40	75	2279
310	2	2 Liver-1-40	1-40	31	2201
311	2	2 Liver-1-40	1-40	43	2066
312	2	2 Liver-1-40	1-40	24	1984
313	2	2 Liver-1-40	1-40	28	1983
314	2	2 Liver-1-40	1-40	79	1936
315	2	2 Liver-1-40	1-40	73	1934
316	2	2 Liver-1-40	1-40	102	1853
317	2	2 Liver-1-40	1-40	10	1825
318	2	2 Liver-1-40	1-40	19	1707
319	2	2 Liver-1-40	1-40	33	1661
320	2	2 Liver-1-40	1-40	87	1624
321	2	2 Liver-1-40	1-40	64	1615
322	2	2 Liver-1-40	1-40	101	1604
323	2	2 Liver-1-40	1-40	26	1558
324	2	2 Liver-1-40	1-40	66	1555
325	2	2 Liver-1-40	1-40	84	1541
326	2	2 Liver-1-40	1-40	76	1533
327	2	2 Liver-1-40	1-40	60	1517
328	2	2 Liver-1-40	1-40	47	1469
329	2	2 Liver-1-40	1-40	92	1433
330	2	2 Liver-1-40	1-40	44	1395
331	2	2 Liver-1-40	1-40	69	1378
332	2	2 Liver-1-40	1-40	65	1350
333	2	2 Liver-1-40	1-40	56	1332
334	2	2 Liver-1-40	1-40	83	1303
335	2	2 Liver-1-40	1-40	58	1276
336	2	2 Liver-1-40	1-40	16	1256
337	2	2 Liver-1-40	1-40	50	1251
338	2	2 Liver-1-40	1-40	67	1248
339	2	2 Liver-1-40	1-40	40	1234
340	2	2 Liver-1-40	1-40	35	1227
341	2	2 Liver-1-40	1-40	95	1219
342	2	2 Liver-1-40	1-40	20	1195
343	2	2 Liver-1-40	1-40	7	1189
344	2	2 Liver-1-40	1-40	5	1155
345	2	2 Liver-1-40	1-40	15	1136
346	2	2 Liver-1-40	1-40	14	1115
347	2	2 Liver-1-40	1-40	6	1108
348	2	2 Liver-1-40	1-40	38	1073
349	2	2 Liver-1-40	1-40	51	1066
350	2	2 Liver-1-40	1-40	21	1059
351	2	2 Liver-1-40	1-40	30	1044
352	2	2 Liver-1-40	1-40	78	1043
353	2	2 Liver-1-40	1-40	34	1029
354	2	2 Liver-1-40	1-40	3	1022
355	2	2 Liver-1-40	1-40	2	1012
356	2	2 Liver-1-40	1-40	42	1002
357	2	2 Liver-1-40	1-40	59	1001
358	3	3 Liver-1-40	1-40	147	91403
359	3	3 Liver-1-40	1-40	283	79300
360	3	3 Liver-1-40	1-40	96	72908
361	3	3 Liver-1-40	1-40	13	68406
362	3	3 Liver-1-40	1-40	303	63545
363	3	3 Liver-1-40	1-40	19	61332
364	3	3 Liver-1-40	1-40	241	60837
365	3	3 Liver-1-40	1-40	245	59993
366	3	3 Liver-1-40	1-40	160	59721
367	3	3 Liver-1-40	1-40	233	59291
368	3	3 Liver-1-40	1-40	56	56875
369	3	3 Liver-1-40	1-40	14	56874
370	3	3 Liver-1-40	1-40	148	55578
371	3	3 Liver-1-40	1-40	216	55053
372	3	3 Liver-1-40	1-40	260	53464
373	3	3 Liver-1-40	1-40	326	52465
374	3	3 Liver-1-40	1-40	221	51830
375	3	3 Liver-1-40	1-40	62	51422
376	3	3 Liver-1-40	1-40	84	50601
377	3	3 Liver-1-40	1-40	7	50101
378	3	3 Liver-1-40	1-40	295	48669
379	3	3 Liver-1-40	1-40	65	48216
380	3	3 Liver-1-40	1-40	267	47204
381	3	3 Liver-1-40	1-40	8	46191
382	3	3 Liver-1-40	1-40	288	44893
383	3	3 Liver-1-40	1-40	176	43953
384	3	3 Liver-1-40	1-40	311	43007
385	3	3 Liver-1-40	1-40	144	42354
386	3	3 Liver-1-40	1-40	131	42072
387	3	3 Liver-1-40	1-40	136	41609
388	3	3 Liver-1-40	1-40	18	40391
389	3	3 Liver-1-40	1-40	101	40308
390	3	3 Liver-1-40	1-40	119	40132
391	3	3 Liver-1-40	1-40	68	39587
392	3	3 Liver-1-40	1-40	66	38878
393	3	3 Liver-1-40	1-40	3	38286
394	3	3 Liver-1-40	1-40	42	37120
395	3	3 Liver-1-40	1-40	140	37067
396	3	3 Liver-1-40	1-40	55	36089
397	3	3 Liver-1-40	1-40	36	31820
398	3	3 Liver-1-40	1-40	268	31793
399	3	3 Liver-1-40	1-40	108	31501
400	3	3 Liver-1-40	1-40	224	31373
401	3	3 Liver-1-40	1-40	323	31304
402	3	3 Liver-1-40	1-40	247	31107
403	3	3 Liver-1-40	1-40	182	30989
404	3	3 Liver-1-40	1-40	275	30901
405	3	3 Liver-1-40	1-40	331	29839
406	3	3 Liver-1-40	1-40	159	29612
407	3	3 Liver-1-40	1-40	53	29398
408	3	3 Liver-1-40	1-40	238	29053
409	3	3 Liver-1-40	1-40	272	27983
410	3	3 Liver-1-40	1-40	130	27499
411	3	3 Liver-1-40	1-40	317	26101
412	3	3 Liver-1-40	1-40	187	25518
413	3	3 Liver-1-40	1-40	168	25509
414	3	3 Liver-1-40	1-40	74	25364
415	3	3 Liver-1-40	1-40	258	24506
416	3	3 Liver-1-40	1-40	215	23370
417	3	3 Liver-1-40	1-40	22	22753
418	3	3 Liver-1-40	1-40	175	22308
419	3	3 Liver-1-40	1-40	114	22242
420	3	3 Liver-1-40	1-40	34	22105
421	3	3 Liver-1-40	1-40	124	21915
422	3	3 Liver-1-40	1-40	296	21888
423	3	3 Liver-1-40	1-40	249	21795
424	3	3 Liver-1-40	1-40	45	21377
425	3	3 Liver-1-40	1-40	329	21125
426	3	3 Liver-1-40	1-40	333	21030
427	3	3 Liver-1-40	1-40	225	20770
428	3	3 Liver-1-40	1-40	57	20084
429	3	3 Liver-1-40	1-40	211	19703
430	3	3 Liver-1-40	1-40	162	19528
431	3	3 Liver-1-40	1-40	60	19345
432	3	3 Liver-1-40	1-40	21	18743
433	3	3 Liver-1-40	1-40	226	18636
434	3	3 Liver-1-40	1-40	125	18346
435	3	3 Liver-1-40	1-40	251	18033
436	3	3 Liver-1-40	1-40	133	16900
437	3	3 Liver-1-40	1-40	213	16847
438	3	3 Liver-1-40	1-40	97	16808
439	3	3 Liver-1-40	1-40	167	16674
440	3	3 Liver-1-40	1-40	279	16549
441	3	3 Liver-1-40	1-40	117	16080
442	3	3 Liver-1-40	1-40	134	15975
443	3	3 Liver-1-40	1-40	184	15644
444	3	3 Liver-1-40	1-40	91	15545
445	3	3 Liver-1-40	1-40	306	15041
446	3	3 Liver-1-40	1-40	95	14894
447	3	3 Liver-1-40	1-40	63	14435
448	3	3 Liver-1-40	1-40	166	14414
449	3	3 Liver-1-40	1-40	192	14339
450	3	3 Liver-1-40	1-40	104	14215
451	3	3 Liver-1-40	1-40	186	14035
452	3	3 Liver-1-40	1-40	25	14027
453	3	3 Liver-1-40	1-40	276	13985
454	3	3 Liver-1-40	1-40	190	13922
455	3	3 Liver-1-40	1-40	132	13877
456	3	3 Liver-1-40	1-40	164	13647
457	3	3 Liver-1-40	1-40	4	13312
458	3	3 Liver-1-40	1-40	16	13258
459	3	3 Liver-1-40	1-40	83	12607
460	3	3 Liver-1-40	1-40	112	12495
461	3	3 Liver-1-40	1-40	78	12383
462	3	3 Liver-1-40	1-40	201	12171
463	3	3 Liver-1-40	1-40	209	12121
464	3	3 Liver-1-40	1-40	339	11684
465	3	3 Liver-1-40	1-40	115	11640
466	3	3 Liver-1-40	1-40	127	11588
467	3	3 Liver-1-40	1-40	313	11498
468	3	3 Liver-1-40	1-40	206	11410
469	3	3 Liver-1-40	1-40	70	11225
470	3	3 Liver-1-40	1-40	297	11106
471	3	3 Liver-1-40	1-40	129	11098
472	3	3 Liver-1-40	1-40	240	10822
473	3	3 Liver-1-40	1-40	67	10759
474	3	3 Liver-1-40	1-40	118	10715
475	3	3 Liver-1-40	1-40	142	10650
476	3	3 Liver-1-40	1-40	71	10558
477	3	3 Liver-1-40	1-40	246	10554
478	3	3 Liver-1-40	1-40	33	10519
479	3	3 Liver-1-40	1-40	92	10406
480	3	3 Liver-1-40	1-40	285	10311
481	3	3 Liver-1-40	1-40	157	10027
482	3	3 Liver-1-40	1-40	214	9836
483	3	3 Liver-1-40	1-40	141	9704
484	3	3 Liver-1-40	1-40	174	9674
485	3	3 Liver-1-40	1-40	54	9623
486	3	3 Liver-1-40	1-40	82	9251
487	3	3 Liver-1-40	1-40	294	9034
488	3	3 Liver-1-40	1-40	312	8842
489	3	3 Liver-1-40	1-40	309	8791
490	3	3 Liver-1-40	1-40	219	8776
491	3	3 Liver-1-40	1-40	86	8726
492	3	3 Liver-1-40	1-40	274	8648
493	3	3 Liver-1-40	1-40	165	8637
494	3	3 Liver-1-40	1-40	301	8544
495	3	3 Liver-1-40	1-40	222	8183
496	3	3 Liver-1-40	1-40	12	8172
497	3	3 Liver-1-40	1-40	218	7991
498	3	3 Liver-1-40	1-40	20	7955
499	3	3 Liver-1-40	1-40	169	7840
500	3	3 Liver-1-40	1-40	177	7764
501	3	3 Liver-1-40	1-40	90	7743
502	3	3 Liver-1-40	1-40	128	7671
503	3	3 Liver-1-40	1-40	332	7650
504	3	3 Liver-1-40	1-40	235	7513
505	3	3 Liver-1-40	1-40	110	7371
506	3	3 Liver-1-40	1-40	212	7371
507	3	3 Liver-1-40	1-40	314	7337
508	3	3 Liver-1-40	1-40	231	7216
509	3	3 Liver-1-40	1-40	223	7157
510	3	3 Liver-1-40	1-40	173	7131
511	3	3 Liver-1-40	1-40	328	7071
512	3	3 Liver-1-40	1-40	151	6994
513	3	3 Liver-1-40	1-40	87	6956
514	3	3 Liver-1-40	1-40	178	6910
515	3	3 Liver-1-40	1-40	1	6889
516	3	3 Liver-1-40	1-40	232	6802
517	3	3 Liver-1-40	1-40	163	6735
518	3	3 Liver-1-40	1-40	44	6683
519	3	3 Liver-1-40	1-40	270	6554
520	3	3 Liver-1-40	1-40	188	6356
521	3	3 Liver-1-40	1-40	277	6184
522	3	3 Liver-1-40	1-40	289	6071
523	3	3 Liver-1-40	1-40	24	5962
524	3	3 Liver-1-40	1-40	281	5883
525	3	3 Liver-1-40	1-40	291	5873
526	3	3 Liver-1-40	1-40	17	5794
527	3	3 Liver-1-40	1-40	316	5706
528	3	3 Liver-1-40	1-40	320	5618
529	3	3 Liver-1-40	1-40	205	5575
530	3	3 Liver-1-40	1-40	59	5490
531	3	3 Liver-1-40	1-40	35	5472
532	3	3 Liver-1-40	1-40	254	5427
533	3	3 Liver-1-40	1-40	183	5284
534	3	3 Liver-1-40	1-40	220	5228
535	3	3 Liver-1-40	1-40	308	5228
536	3	3 Liver-1-40	1-40	255	5057
537	3	3 Liver-1-40	1-40	293	5005
538	3	3 Liver-1-40	1-40	266	4832
539	3	3 Liver-1-40	1-40	10	4787
540	3	3 Liver-1-40	1-40	228	4721
541	3	3 Liver-1-40	1-40	307	4705
542	3	3 Liver-1-40	1-40	298	4637
543	3	3 Liver-1-40	1-40	217	4580
544	3	3 Liver-1-40	1-40	89	4549
545	3	3 Liver-1-40	1-40	196	4489
546	3	3 Liver-1-40	1-40	46	4453
547	3	3 Liver-1-40	1-40	126	4401
548	3	3 Liver-1-40	1-40	146	4399
549	3	3 Liver-1-40	1-40	64	4384
550	3	3 Liver-1-40	1-40	257	4311
551	3	3 Liver-1-40	1-40	137	4277
552	3	3 Liver-1-40	1-40	11	4271
553	3	3 Liver-1-40	1-40	47	4270
554	3	3 Liver-1-40	1-40	335	4268
555	3	3 Liver-1-40	1-40	121	4207
556	3	3 Liver-1-40	1-40	202	4113
557	3	3 Liver-1-40	1-40	72	4105
558	3	3 Liver-1-40	1-40	81	4066
559	3	3 Liver-1-40	1-40	27	4058
560	3	3 Liver-1-40	1-40	271	3998
561	3	3 Liver-1-40	1-40	135	3992
562	3	3 Liver-1-40	1-40	98	3990
563	3	3 Liver-1-40	1-40	248	3970
564	3	3 Liver-1-40	1-40	324	3909
565	3	3 Liver-1-40	1-40	93	3784
566	3	3 Liver-1-40	1-40	26	3770
567	3	3 Liver-1-40	1-40	208	3740
568	3	3 Liver-1-40	1-40	138	3652
569	3	3 Liver-1-40	1-40	76	3613
570	3	3 Liver-1-40	1-40	48	3608
571	3	3 Liver-1-40	1-40	154	3591
572	3	3 Liver-1-40	1-40	315	3551
573	3	3 Liver-1-40	1-40	123	3522
574	3	3 Liver-1-40	1-40	38	3513
575	3	3 Liver-1-40	1-40	262	3501
576	3	3 Liver-1-40	1-40	161	3492
577	3	3 Liver-1-40	1-40	286	3416
578	3	3 Liver-1-40	1-40	172	3394
579	3	3 Liver-1-40	1-40	234	3379
580	3	3 Liver-1-40	1-40	273	3327
581	3	3 Liver-1-40	1-40	284	3305
582	3	3 Liver-1-40	1-40	189	3296
583	3	3 Liver-1-40	1-40	29	3272
584	3	3 Liver-1-40	1-40	171	3246
585	3	3 Liver-1-40	1-40	337	3199
586	3	3 Liver-1-40	1-40	122	3166
587	3	3 Liver-1-40	1-40	229	3115
588	3	3 Liver-1-40	1-40	203	3088
589	3	3 Liver-1-40	1-40	292	3012
590	3	3 Liver-1-40	1-40	61	2945
591	3	3 Liver-1-40	1-40	37	2918
592	3	3 Liver-1-40	1-40	109	2887
593	3	3 Liver-1-40	1-40	69	2879
594	3	3 Liver-1-40	1-40	242	2879
595	3	3 Liver-1-40	1-40	103	2829
596	3	3 Liver-1-40	1-40	185	2799
597	3	3 Liver-1-40	1-40	244	2756
598	3	3 Liver-1-40	1-40	155	2752
599	3	3 Liver-1-40	1-40	2	2693
600	3	3 Liver-1-40	1-40	282	2657
601	3	3 Liver-1-40	1-40	327	2613
602	3	3 Liver-1-40	1-40	152	2612
603	3	3 Liver-1-40	1-40	41	2533
604	3	3 Liver-1-40	1-40	194	2533
605	3	3 Liver-1-40	1-40	304	2531
606	3	3 Liver-1-40	1-40	116	2456
607	3	3 Liver-1-40	1-40	261	2432
608	3	3 Liver-1-40	1-40	264	2412
609	3	3 Liver-1-40	1-40	318	2374
610	3	3 Liver-1-40	1-40	340	2361
611	3	3 Liver-1-40	1-40	156	2336
612	3	3 Liver-1-40	1-40	94	2317
613	3	3 Liver-1-40	1-40	80	2313
614	3	3 Liver-1-40	1-40	210	2284
615	3	3 Liver-1-40	1-40	322	2282
616	3	3 Liver-1-40	1-40	300	2272
617	3	3 Liver-1-40	1-40	310	2256
618	3	3 Liver-1-40	1-40	99	2253
619	3	3 Liver-1-40	1-40	150	2227
620	3	3 Liver-1-40	1-40	51	2182
621	3	3 Liver-1-40	1-40	170	2114
622	3	3 Liver-1-40	1-40	265	2106
623	3	3 Liver-1-40	1-40	49	2092
624	3	3 Liver-1-40	1-40	193	2080
625	3	3 Liver-1-40	1-40	227	2080
626	3	3 Liver-1-40	1-40	191	2060
627	3	3 Liver-1-40	1-40	236	2055
628	3	3 Liver-1-40	1-40	250	2042
629	3	3 Liver-1-40	1-40	302	2004
630	3	3 Liver-1-40	1-40	106	1985
631	3	3 Liver-1-40	1-40	252	1953
632	3	3 Liver-1-40	1-40	336	1949
633	3	3 Liver-1-40	1-40	321	1889
634	3	3 Liver-1-40	1-40	200	1877
635	3	3 Liver-1-40	1-40	15	1866
636	3	3 Liver-1-40	1-40	30	1784
637	3	3 Liver-1-40	1-40	330	1751
638	3	3 Liver-1-40	1-40	207	1677
639	3	3 Liver-1-40	1-40	120	1638
640	3	3 Liver-1-40	1-40	40	1634
641	3	3 Liver-1-40	1-40	259	1630
642	3	3 Liver-1-40	1-40	290	1619
643	3	3 Liver-1-40	1-40	181	1601
644	3	3 Liver-1-40	1-40	256	1566
645	3	3 Liver-1-40	1-40	299	1544
646	3	3 Liver-1-40	1-40	280	1527
647	3	3 Liver-1-40	1-40	39	1505
648	3	3 Liver-1-40	1-40	100	1503
649	3	3 Liver-1-40	1-40	75	1500
650	3	3 Liver-1-40	1-40	237	1477
651	3	3 Liver-1-40	1-40	6	1474
652	3	3 Liver-1-40	1-40	197	1459
653	3	3 Liver-1-40	1-40	145	1436
654	3	3 Liver-1-40	1-40	139	1435
655	3	3 Liver-1-40	1-40	263	1410
656	3	3 Liver-1-40	1-40	199	1402
657	3	3 Liver-1-40	1-40	243	1386
658	3	3 Liver-1-40	1-40	32	1366
659	3	3 Liver-1-40	1-40	338	1363
660	3	3 Liver-1-40	1-40	325	1339
661	3	3 Liver-1-40	1-40	58	1338
662	3	3 Liver-1-40	1-40	198	1336
663	3	3 Liver-1-40	1-40	107	1327
664	3	3 Liver-1-40	1-40	180	1310
665	3	3 Liver-1-40	1-40	102	1304
666	3	3 Liver-1-40	1-40	111	1304
667	3	3 Liver-1-40	1-40	73	1302
668	3	3 Liver-1-40	1-40	158	1300
669	3	3 Liver-1-40	1-40	287	1279
670	3	3 Liver-1-40	1-40	23	1274
671	3	3 Liver-1-40	1-40	230	1270
672	3	3 Liver-1-40	1-40	88	1266
673	3	3 Liver-1-40	1-40	5	1265
674	3	3 Liver-1-40	1-40	341	1263
675	3	3 Liver-1-40	1-40	334	1242
676	3	3 Liver-1-40	1-40	31	1237
677	3	3 Liver-1-40	1-40	195	1232
678	3	3 Liver-1-40	1-40	77	1229
679	3	3 Liver-1-40	1-40	153	1219
680	3	3 Liver-1-40	1-40	278	1201
681	3	3 Liver-1-40	1-40	52	1183
682	3	3 Liver-1-40	1-40	28	1170
683	3	3 Liver-1-40	1-40	253	1146
684	3	3 Liver-1-40	1-40	319	1139
685	3	3 Liver-1-40	1-40	269	1126
686	3	3 Liver-1-40	1-40	204	1118
687	3	3 Liver-1-40	1-40	113	1114
688	3	3 Liver-1-40	1-40	9	1108
689	3	3 Liver-1-40	1-40	149	1108
690	3	3 Liver-1-40	1-40	305	1104
691	3	3 Liver-1-40	1-40	239	1101
692	3	3 Liver-1-40	1-40	79	1095
693	3	3 Liver-1-40	1-40	143	1080
694	3	3 Liver-1-40	1-40	105	1067
695	3	3 Liver-1-40	1-40	179	1028
696	3	3 Liver-1-40	1-40	50	1023
697	3	3 Liver-1-40	1-40	85	1012
698	3	3 Liver-1-40	1-40	43	1010
699	4	4 Liver-1-40	1-40	50	65031
700	4	4 Liver-1-40	1-40	47	54294
701	4	4 Liver-1-40	1-40	53	42423
702	4	4 Liver-1-40	1-40	4	34099
703	4	4 Liver-1-40	1-40	12	29856
704	4	4 Liver-1-40	1-40	18	29309
705	4	4 Liver-1-40	1-40	39	23907
706	4	4 Liver-1-40	1-40	35	21256
707	4	4 Liver-1-40	1-40	13	19277
708	4	4 Liver-1-40	1-40	3	17513
709	4	4 Liver-1-40	1-40	38	17169
710	4	4 Liver-1-40	1-40	49	14474
711	4	4 Liver-1-40	1-40	51	13842
712	4	4 Liver-1-40	1-40	44	13186
713	4	4 Liver-1-40	1-40	46	12999
714	4	4 Liver-1-40	1-40	22	11839
715	4	4 Liver-1-40	1-40	8	9619
716	4	4 Liver-1-40	1-40	36	9408
717	4	4 Liver-1-40	1-40	40	9333
718	4	4 Liver-1-40	1-40	30	8723
719	4	4 Liver-1-40	1-40	7	8694
720	4	4 Liver-1-40	1-40	41	8172
721	4	4 Liver-1-40	1-40	45	7656
722	4	4 Liver-1-40	1-40	16	6308
723	4	4 Liver-1-40	1-40	20	5462
724	4	4 Liver-1-40	1-40	43	5405
725	4	4 Liver-1-40	1-40	48	5102
726	4	4 Liver-1-40	1-40	5	5047
727	4	4 Liver-1-40	1-40	27	4636
728	4	4 Liver-1-40	1-40	11	4631
729	4	4 Liver-1-40	1-40	34	4276
730	4	4 Liver-1-40	1-40	17	3887
731	4	4 Liver-1-40	1-40	21	3371
732	4	4 Liver-1-40	1-40	33	2956
733	4	4 Liver-1-40	1-40	9	2879
734	4	4 Liver-1-40	1-40	31	2870
735	4	4 Liver-1-40	1-40	14	2579
736	4	4 Liver-1-40	1-40	10	2574
737	4	4 Liver-1-40	1-40	23	2069
738	4	4 Liver-1-40	1-40	32	2001
739	4	4 Liver-1-40	1-40	28	1915
740	4	4 Liver-1-40	1-40	15	1847
741	4	4 Liver-1-40	1-40	2	1828
742	4	4 Liver-1-40	1-40	6	1783
743	4	4 Liver-1-40	1-40	24	1666
744	4	4 Liver-1-40	1-40	25	1659
745	4	4 Liver-1-40	1-40	19	1565
746	4	4 Liver-1-40	1-40	52	1518
747	4	4 Liver-1-40	1-40	26	1412
748	4	4 Liver-1-40	1-40	42	1380
749	4	4 Liver-1-40	1-40	37	1220
750	4	4 Liver-1-40	1-40	29	1192
751	4	4 Liver-1-40	1-40	1	1021
752	5	5 Liver-1-40	1-40	107	68010
753	5	5 Liver-1-40	1-40	19	59664
754	5	5 Liver-1-40	1-40	87	56633
755	5	5 Liver-1-40	1-40	9	45322
756	5	5 Liver-1-40	1-40	84	38677
757	5	5 Liver-1-40	1-40	18	38540
758	5	5 Liver-1-40	1-40	77	37842
759	5	5 Liver-1-40	1-40	5	36799
760	5	5 Liver-1-40	1-40	28	34978
761	5	5 Liver-1-40	1-40	66	31914
762	5	5 Liver-1-40	1-40	92	31704
763	5	5 Liver-1-40	1-40	65	31147
764	5	5 Liver-1-40	1-40	50	31109
765	5	5 Liver-1-40	1-40	81	30291
766	5	5 Liver-1-40	1-40	26	30215
767	5	5 Liver-1-40	1-40	58	29820
768	5	5 Liver-1-40	1-40	3	28772
769	5	5 Liver-1-40	1-40	8	28678
770	5	5 Liver-1-40	1-40	41	28632
771	5	5 Liver-1-40	1-40	35	26984
772	5	5 Liver-1-40	1-40	93	25582
773	5	5 Liver-1-40	1-40	57	25424
774	5	5 Liver-1-40	1-40	96	25357
775	5	5 Liver-1-40	1-40	52	24956
776	5	5 Liver-1-40	1-40	71	24570
777	5	5 Liver-1-40	1-40	78	22535
778	5	5 Liver-1-40	1-40	60	22528
779	5	5 Liver-1-40	1-40	34	21832
780	5	5 Liver-1-40	1-40	43	21770
781	5	5 Liver-1-40	1-40	20	21231
782	5	5 Liver-1-40	1-40	51	20552
783	5	5 Liver-1-40	1-40	75	20471
784	5	5 Liver-1-40	1-40	25	20323
785	5	5 Liver-1-40	1-40	31	19811
786	5	5 Liver-1-40	1-40	114	18584
787	5	5 Liver-1-40	1-40	32	18477
788	5	5 Liver-1-40	1-40	105	18307
789	5	5 Liver-1-40	1-40	62	18187
790	5	5 Liver-1-40	1-40	111	18127
791	5	5 Liver-1-40	1-40	46	16807
792	5	5 Liver-1-40	1-40	54	16384
793	5	5 Liver-1-40	1-40	39	16151
794	5	5 Liver-1-40	1-40	12	15446
795	5	5 Liver-1-40	1-40	2	15273
796	5	5 Liver-1-40	1-40	104	14470
797	5	5 Liver-1-40	1-40	49	14428
798	5	5 Liver-1-40	1-40	30	13671
799	5	5 Liver-1-40	1-40	53	13493
800	5	5 Liver-1-40	1-40	69	13481
801	5	5 Liver-1-40	1-40	24	13325
802	5	5 Liver-1-40	1-40	40	12917
803	5	5 Liver-1-40	1-40	109	12720
804	5	5 Liver-1-40	1-40	82	12636
805	5	5 Liver-1-40	1-40	36	12521
806	5	5 Liver-1-40	1-40	72	12469
807	5	5 Liver-1-40	1-40	73	12267
808	5	5 Liver-1-40	1-40	17	11884
809	5	5 Liver-1-40	1-40	22	11818
810	5	5 Liver-1-40	1-40	38	11569
811	5	5 Liver-1-40	1-40	33	11363
812	5	5 Liver-1-40	1-40	91	11262
813	5	5 Liver-1-40	1-40	1	11155
814	5	5 Liver-1-40	1-40	79	10747
815	5	5 Liver-1-40	1-40	11	10257
816	5	5 Liver-1-40	1-40	67	10130
817	5	5 Liver-1-40	1-40	101	9599
818	5	5 Liver-1-40	1-40	47	9412
819	5	5 Liver-1-40	1-40	29	9226
820	5	5 Liver-1-40	1-40	80	9225
821	5	5 Liver-1-40	1-40	99	8564
822	5	5 Liver-1-40	1-40	117	8489
823	5	5 Liver-1-40	1-40	112	8121
824	5	5 Liver-1-40	1-40	37	7889
825	5	5 Liver-1-40	1-40	59	7829
826	5	5 Liver-1-40	1-40	56	7419
827	5	5 Liver-1-40	1-40	44	7104
828	5	5 Liver-1-40	1-40	95	7100
829	5	5 Liver-1-40	1-40	23	7097
830	5	5 Liver-1-40	1-40	102	6948
831	5	5 Liver-1-40	1-40	14	6267
832	5	5 Liver-1-40	1-40	10	5790
833	5	5 Liver-1-40	1-40	88	5630
834	5	5 Liver-1-40	1-40	21	5337
835	5	5 Liver-1-40	1-40	98	4828
836	5	5 Liver-1-40	1-40	116	4397
837	5	5 Liver-1-40	1-40	55	3908
838	5	5 Liver-1-40	1-40	106	3684
839	5	5 Liver-1-40	1-40	64	3304
840	5	5 Liver-1-40	1-40	27	3302
841	5	5 Liver-1-40	1-40	97	3025
842	5	5 Liver-1-40	1-40	113	3013
843	5	5 Liver-1-40	1-40	110	2859
844	5	5 Liver-1-40	1-40	4	2767
845	5	5 Liver-1-40	1-40	63	2680
846	5	5 Liver-1-40	1-40	70	2672
847	5	5 Liver-1-40	1-40	61	2631
848	5	5 Liver-1-40	1-40	6	2559
849	5	5 Liver-1-40	1-40	89	2465
850	5	5 Liver-1-40	1-40	85	2447
851	5	5 Liver-1-40	1-40	48	2429
852	5	5 Liver-1-40	1-40	42	2270
853	5	5 Liver-1-40	1-40	7	2224
854	5	5 Liver-1-40	1-40	45	2119
855	5	5 Liver-1-40	1-40	74	2068
856	5	5 Liver-1-40	1-40	16	2023
857	5	5 Liver-1-40	1-40	94	1971
858	5	5 Liver-1-40	1-40	108	1954
859	5	5 Liver-1-40	1-40	119	1903
860	5	5 Liver-1-40	1-40	90	1735
861	5	5 Liver-1-40	1-40	15	1676
862	5	5 Liver-1-40	1-40	118	1459
863	5	5 Liver-1-40	1-40	68	1451
864	5	5 Liver-1-40	1-40	76	1324
865	5	5 Liver-1-40	1-40	100	1308
866	5	5 Liver-1-40	1-40	103	1275
867	5	5 Liver-1-40	1-40	115	1198
868	5	5 Liver-1-40	1-40	83	1093
869	5	5 Liver-1-40	1-40	13	1079
870	5	5 Liver-1-40	1-40	86	1005
871	6	6 Liver-1-40	1-40	60	7758
872	6	6 Liver-1-40	1-40	336	5760
873	6	6 Liver-1-40	1-40	697	4226
874	6	6 Liver-1-40	1-40	371	4121
875	6	6 Liver-1-40	1-40	138	3457
876	6	6 Liver-1-40	1-40	153	3393
877	6	6 Liver-1-40	1-40	258	3314
878	6	6 Liver-1-40	1-40	132	3257
879	6	6 Liver-1-40	1-40	703	3190
880	6	6 Liver-1-40	1-40	523	2908
881	6	6 Liver-1-40	1-40	345	2790
882	6	6 Liver-1-40	1-40	226	2741
883	6	6 Liver-1-40	1-40	342	2660
884	6	6 Liver-1-40	1-40	727	2584
885	6	6 Liver-1-40	1-40	626	2491
886	6	6 Liver-1-40	1-40	453	2470
887	6	6 Liver-1-40	1-40	481	2465
888	6	6 Liver-1-40	1-40	617	2331
889	6	6 Liver-1-40	1-40	741	2267
890	6	6 Liver-1-40	1-40	308	2264
891	6	6 Liver-1-40	1-40	561	2261
892	6	6 Liver-1-40	1-40	621	2231
893	6	6 Liver-1-40	1-40	539	2219
894	6	6 Liver-1-40	1-40	97	2217
895	6	6 Liver-1-40	1-40	298	2148
896	6	6 Liver-1-40	1-40	632	2126
897	6	6 Liver-1-40	1-40	472	2114
898	6	6 Liver-1-40	1-40	417	2107
899	6	6 Liver-1-40	1-40	244	2060
900	6	6 Liver-1-40	1-40	556	1995
901	6	6 Liver-1-40	1-40	247	1952
902	6	6 Liver-1-40	1-40	350	1949
903	6	6 Liver-1-40	1-40	5	1923
904	6	6 Liver-1-40	1-40	698	1891
905	6	6 Liver-1-40	1-40	363	1878
906	6	6 Liver-1-40	1-40	166	1847
907	6	6 Liver-1-40	1-40	562	1837
908	6	6 Liver-1-40	1-40	501	1818
909	6	6 Liver-1-40	1-40	517	1798
910	6	6 Liver-1-40	1-40	390	1773
911	6	6 Liver-1-40	1-40	440	1763
912	6	6 Liver-1-40	1-40	490	1748
913	6	6 Liver-1-40	1-40	546	1735
914	6	6 Liver-1-40	1-40	260	1717
915	6	6 Liver-1-40	1-40	400	1716
916	6	6 Liver-1-40	1-40	428	1707
917	6	6 Liver-1-40	1-40	408	1688
918	6	6 Liver-1-40	1-40	88	1672
919	6	6 Liver-1-40	1-40	148	1668
920	6	6 Liver-1-40	1-40	257	1662
921	6	6 Liver-1-40	1-40	735	1641
922	6	6 Liver-1-40	1-40	491	1622
923	6	6 Liver-1-40	1-40	667	1620
924	6	6 Liver-1-40	1-40	175	1604
925	6	6 Liver-1-40	1-40	1	1599
926	6	6 Liver-1-40	1-40	275	1598
927	6	6 Liver-1-40	1-40	334	1574
928	6	6 Liver-1-40	1-40	475	1569
929	6	6 Liver-1-40	1-40	344	1542
930	6	6 Liver-1-40	1-40	283	1534
931	6	6 Liver-1-40	1-40	609	1532
932	6	6 Liver-1-40	1-40	710	1521
933	6	6 Liver-1-40	1-40	694	1512
934	6	6 Liver-1-40	1-40	58	1505
935	6	6 Liver-1-40	1-40	642	1505
936	6	6 Liver-1-40	1-40	348	1504
937	6	6 Liver-1-40	1-40	560	1490
938	6	6 Liver-1-40	1-40	476	1487
939	6	6 Liver-1-40	1-40	614	1442
940	6	6 Liver-1-40	1-40	120	1419
941	6	6 Liver-1-40	1-40	251	1418
942	6	6 Liver-1-40	1-40	117	1401
943	6	6 Liver-1-40	1-40	82	1392
944	6	6 Liver-1-40	1-40	103	1383
945	6	6 Liver-1-40	1-40	326	1377
946	6	6 Liver-1-40	1-40	40	1348
947	6	6 Liver-1-40	1-40	337	1343
948	6	6 Liver-1-40	1-40	653	1314
949	6	6 Liver-1-40	1-40	21	1308
950	6	6 Liver-1-40	1-40	677	1293
951	6	6 Liver-1-40	1-40	355	1281
952	6	6 Liver-1-40	1-40	69	1279
953	6	6 Liver-1-40	1-40	507	1273
954	6	6 Liver-1-40	1-40	455	1270
955	6	6 Liver-1-40	1-40	673	1266
956	6	6 Liver-1-40	1-40	676	1252
957	6	6 Liver-1-40	1-40	141	1246
958	6	6 Liver-1-40	1-40	64	1243
959	6	6 Liver-1-40	1-40	589	1224
960	6	6 Liver-1-40	1-40	638	1221
961	6	6 Liver-1-40	1-40	384	1220
962	6	6 Liver-1-40	1-40	380	1214
963	6	6 Liver-1-40	1-40	603	1205
964	6	6 Liver-1-40	1-40	494	1203
965	6	6 Liver-1-40	1-40	311	1199
966	6	6 Liver-1-40	1-40	580	1193
967	6	6 Liver-1-40	1-40	575	1190
968	6	6 Liver-1-40	1-40	343	1184
969	6	6 Liver-1-40	1-40	541	1170
970	6	6 Liver-1-40	1-40	80	1169
971	6	6 Liver-1-40	1-40	418	1161
972	6	6 Liver-1-40	1-40	200	1153
973	6	6 Liver-1-40	1-40	460	1143
974	6	6 Liver-1-40	1-40	473	1139
975	6	6 Liver-1-40	1-40	596	1136
976	6	6 Liver-1-40	1-40	543	1135
977	6	6 Liver-1-40	1-40	169	1129
978	6	6 Liver-1-40	1-40	531	1128
979	6	6 Liver-1-40	1-40	178	1108
980	6	6 Liver-1-40	1-40	647	1108
981	6	6 Liver-1-40	1-40	646	1098
982	6	6 Liver-1-40	1-40	484	1097
983	6	6 Liver-1-40	1-40	639	1091
984	6	6 Liver-1-40	1-40	32	1087
985	6	6 Liver-1-40	1-40	170	1087
986	6	6 Liver-1-40	1-40	612	1081
987	6	6 Liver-1-40	1-40	634	1073
988	6	6 Liver-1-40	1-40	456	1068
989	6	6 Liver-1-40	1-40	323	1065
990	6	6 Liver-1-40	1-40	186	1059
991	6	6 Liver-1-40	1-40	219	1050
992	6	6 Liver-1-40	1-40	217	1046
993	6	6 Liver-1-40	1-40	454	1045
994	6	6 Liver-1-40	1-40	87	1034
995	6	6 Liver-1-40	1-40	520	1029
996	6	6 Liver-1-40	1-40	382	1028
997	6	6 Liver-1-40	1-40	111	1021
998	6	6 Liver-1-40	1-40	63	1014
999	6	6 Liver-1-40	1-40	700	999
1000	6	6 Liver-1-40	1-40	518	993
1001	6	6 Liver-1-40	1-40	441	989
1002	6	6 Liver-1-40	1-40	212	988
1003	6	6 Liver-1-40	1-40	37	987
1004	6	6 Liver-1-40	1-40	449	983
1005	6	6 Liver-1-40	1-40	570	982
1006	6	6 Liver-1-40	1-40	586	977
1007	6	6 Liver-1-40	1-40	680	974
1008	6	6 Liver-1-40	1-40	118	973
1009	6	6 Liver-1-40	1-40	534	962
1010	6	6 Liver-1-40	1-40	205	958
1011	6	6 Liver-1-40	1-40	272	955
1012	6	6 Liver-1-40	1-40	585	948
1013	6	6 Liver-1-40	1-40	545	946
1014	6	6 Liver-1-40	1-40	234	942
1015	6	6 Liver-1-40	1-40	563	932
1016	6	6 Liver-1-40	1-40	591	912
1017	6	6 Liver-1-40	1-40	379	907
1018	6	6 Liver-1-40	1-40	471	905
1019	6	6 Liver-1-40	1-40	172	898
1020	6	6 Liver-1-40	1-40	529	895
1021	6	6 Liver-1-40	1-40	391	883
1022	6	6 Liver-1-40	1-40	434	883
1023	6	6 Liver-1-40	1-40	295	880
1024	6	6 Liver-1-40	1-40	163	874
1025	6	6 Liver-1-40	1-40	395	870
1026	6	6 Liver-1-40	1-40	450	868
1027	6	6 Liver-1-40	1-40	314	867
1028	6	6 Liver-1-40	1-40	207	863
1029	6	6 Liver-1-40	1-40	487	857
1030	6	6 Liver-1-40	1-40	145	854
1031	6	6 Liver-1-40	1-40	333	853
1032	6	6 Liver-1-40	1-40	425	852
1033	6	6 Liver-1-40	1-40	386	851
1034	6	6 Liver-1-40	1-40	319	838
1035	6	6 Liver-1-40	1-40	537	837
1036	6	6 Liver-1-40	1-40	151	834
1037	6	6 Liver-1-40	1-40	579	834
1038	6	6 Liver-1-40	1-40	267	833
1039	6	6 Liver-1-40	1-40	196	832
1040	6	6 Liver-1-40	1-40	716	832
1041	6	6 Liver-1-40	1-40	312	821
1042	6	6 Liver-1-40	1-40	110	813
1043	6	6 Liver-1-40	1-40	235	805
1044	6	6 Liver-1-40	1-40	542	804
1045	6	6 Liver-1-40	1-40	127	802
1046	6	6 Liver-1-40	1-40	14	798
1047	6	6 Liver-1-40	1-40	508	796
1048	6	6 Liver-1-40	1-40	214	788
1049	6	6 Liver-1-40	1-40	79	787
1050	6	6 Liver-1-40	1-40	439	787
1051	6	6 Liver-1-40	1-40	95	783
1052	6	6 Liver-1-40	1-40	280	783
1053	6	6 Liver-1-40	1-40	565	780
1054	6	6 Liver-1-40	1-40	515	779
1055	6	6 Liver-1-40	1-40	506	773
1056	6	6 Liver-1-40	1-40	29	772
1057	6	6 Liver-1-40	1-40	68	759
1058	6	6 Liver-1-40	1-40	206	750
1059	6	6 Liver-1-40	1-40	306	750
1060	6	6 Liver-1-40	1-40	268	749
1061	6	6 Liver-1-40	1-40	89	748
1062	6	6 Liver-1-40	1-40	572	747
1063	6	6 Liver-1-40	1-40	577	747
1064	6	6 Liver-1-40	1-40	683	747
1065	6	6 Liver-1-40	1-40	376	745
1066	6	6 Liver-1-40	1-40	38	744
1067	6	6 Liver-1-40	1-40	86	739
1068	6	6 Liver-1-40	1-40	254	734
1069	6	6 Liver-1-40	1-40	287	729
1070	6	6 Liver-1-40	1-40	259	724
1071	6	6 Liver-1-40	1-40	628	721
1072	6	6 Liver-1-40	1-40	33	712
1073	6	6 Liver-1-40	1-40	443	712
1074	6	6 Liver-1-40	1-40	651	705
1075	6	6 Liver-1-40	1-40	104	703
1076	6	6 Liver-1-40	1-40	593	700
1077	6	6 Liver-1-40	1-40	407	693
1078	6	6 Liver-1-40	1-40	608	693
1079	6	6 Liver-1-40	1-40	100	690
1080	6	6 Liver-1-40	1-40	222	681
1081	6	6 Liver-1-40	1-40	75	680
1082	6	6 Liver-1-40	1-40	360	679
1083	6	6 Liver-1-40	1-40	190	678
1084	6	6 Liver-1-40	1-40	224	678
1085	6	6 Liver-1-40	1-40	576	677
1086	6	6 Liver-1-40	1-40	52	669
1087	6	6 Liver-1-40	1-40	121	667
1088	6	6 Liver-1-40	1-40	59	666
1089	6	6 Liver-1-40	1-40	671	662
1090	6	6 Liver-1-40	1-40	46	659
1091	6	6 Liver-1-40	1-40	738	659
1092	6	6 Liver-1-40	1-40	435	658
1093	6	6 Liver-1-40	1-40	459	658
1094	6	6 Liver-1-40	1-40	675	658
1095	6	6 Liver-1-40	1-40	701	657
1096	6	6 Liver-1-40	1-40	309	652
1097	6	6 Liver-1-40	1-40	552	642
1098	6	6 Liver-1-40	1-40	310	638
1099	6	6 Liver-1-40	1-40	261	637
1100	6	6 Liver-1-40	1-40	139	635
1101	6	6 Liver-1-40	1-40	413	632
1102	6	6 Liver-1-40	1-40	582	631
1103	6	6 Liver-1-40	1-40	13	628
1104	6	6 Liver-1-40	1-40	377	625
1105	6	6 Liver-1-40	1-40	403	623
1106	6	6 Liver-1-40	1-40	551	623
1107	6	6 Liver-1-40	1-40	124	622
1108	6	6 Liver-1-40	1-40	8	621
1109	6	6 Liver-1-40	1-40	340	620
1110	6	6 Liver-1-40	1-40	249	616
1111	6	6 Liver-1-40	1-40	16	615
1112	6	6 Liver-1-40	1-40	81	614
1113	6	6 Liver-1-40	1-40	225	611
1114	6	6 Liver-1-40	1-40	430	608
1115	6	6 Liver-1-40	1-40	51	607
1116	6	6 Liver-1-40	1-40	174	607
1117	6	6 Liver-1-40	1-40	670	604
1118	6	6 Liver-1-40	1-40	606	601
1119	6	6 Liver-1-40	1-40	17	600
1120	6	6 Liver-1-40	1-40	415	600
1121	6	6 Liver-1-40	1-40	489	599
1122	6	6 Liver-1-40	1-40	236	596
1123	6	6 Liver-1-40	1-40	558	595
1124	6	6 Liver-1-40	1-40	733	595
1125	6	6 Liver-1-40	1-40	239	593
1126	6	6 Liver-1-40	1-40	50	590
1127	6	6 Liver-1-40	1-40	209	582
1128	6	6 Liver-1-40	1-40	505	582
1129	6	6 Liver-1-40	1-40	83	579
1130	6	6 Liver-1-40	1-40	4	572
1131	6	6 Liver-1-40	1-40	514	570
1132	6	6 Liver-1-40	1-40	592	568
1133	6	6 Liver-1-40	1-40	650	565
1134	6	6 Liver-1-40	1-40	524	563
1135	6	6 Liver-1-40	1-40	119	561
1136	6	6 Liver-1-40	1-40	372	561
1137	6	6 Liver-1-40	1-40	661	559
1138	6	6 Liver-1-40	1-40	230	556
1139	6	6 Liver-1-40	1-40	11	555
1140	6	6 Liver-1-40	1-40	303	554
1141	6	6 Liver-1-40	1-40	483	554
1142	6	6 Liver-1-40	1-40	662	554
1143	6	6 Liver-1-40	1-40	339	553
1144	6	6 Liver-1-40	1-40	495	551
1145	6	6 Liver-1-40	1-40	427	550
1146	6	6 Liver-1-40	1-40	708	549
1147	6	6 Liver-1-40	1-40	364	547
1148	6	6 Liver-1-40	1-40	353	543
1149	6	6 Liver-1-40	1-40	179	541
1150	6	6 Liver-1-40	1-40	611	538
1151	6	6 Liver-1-40	1-40	78	537
1152	6	6 Liver-1-40	1-40	477	533
1153	6	6 Liver-1-40	1-40	705	533
1154	6	6 Liver-1-40	1-40	271	524
1155	6	6 Liver-1-40	1-40	724	523
1156	6	6 Liver-1-40	1-40	246	521
1157	6	6 Liver-1-40	1-40	620	521
1158	6	6 Liver-1-40	1-40	62	520
1159	6	6 Liver-1-40	1-40	328	519
1160	6	6 Liver-1-40	1-40	351	516
1161	6	6 Liver-1-40	1-40	401	515
1162	6	6 Liver-1-40	1-40	695	509
1163	6	6 Liver-1-40	1-40	601	508
1164	6	6 Liver-1-40	1-40	36	505
1165	6	6 Liver-1-40	1-40	286	499
1166	6	6 Liver-1-40	1-40	122	496
1167	6	6 Liver-1-40	1-40	294	494
1168	6	6 Liver-1-40	1-40	41	492
1169	6	6 Liver-1-40	1-40	256	485
1170	6	6 Liver-1-40	1-40	35	484
1171	6	6 Liver-1-40	1-40	595	480
1172	6	6 Liver-1-40	1-40	714	480
1173	6	6 Liver-1-40	1-40	532	479
1174	6	6 Liver-1-40	1-40	584	477
1175	6	6 Liver-1-40	1-40	188	476
1176	6	6 Liver-1-40	1-40	15	472
1177	6	6 Liver-1-40	1-40	470	472
1178	6	6 Liver-1-40	1-40	648	471
1179	6	6 Liver-1-40	1-40	74	468
1180	6	6 Liver-1-40	1-40	231	468
1181	6	6 Liver-1-40	1-40	270	460
1182	6	6 Liver-1-40	1-40	499	459
1183	6	6 Liver-1-40	1-40	332	452
1184	6	6 Liver-1-40	1-40	262	451
1185	6	6 Liver-1-40	1-40	702	451
1186	6	6 Liver-1-40	1-40	243	448
1187	6	6 Liver-1-40	1-40	54	445
1188	6	6 Liver-1-40	1-40	76	441
1189	6	6 Liver-1-40	1-40	248	441
1190	6	6 Liver-1-40	1-40	70	432
1191	6	6 Liver-1-40	1-40	682	431
1192	6	6 Liver-1-40	1-40	426	426
1193	6	6 Liver-1-40	1-40	131	424
1194	6	6 Liver-1-40	1-40	389	424
1195	6	6 Liver-1-40	1-40	299	423
1196	6	6 Liver-1-40	1-40	631	421
1197	6	6 Liver-1-40	1-40	187	420
1198	6	6 Liver-1-40	1-40	381	420
1199	6	6 Liver-1-40	1-40	91	419
1200	6	6 Liver-1-40	1-40	445	419
1201	6	6 Liver-1-40	1-40	497	416
1202	6	6 Liver-1-40	1-40	527	416
1203	6	6 Liver-1-40	1-40	26	415
1204	6	6 Liver-1-40	1-40	458	413
1205	6	6 Liver-1-40	1-40	9	411
1206	6	6 Liver-1-40	1-40	266	410
1207	6	6 Liver-1-40	1-40	512	407
1208	6	6 Liver-1-40	1-40	590	407
1209	6	6 Liver-1-40	1-40	210	404
1210	6	6 Liver-1-40	1-40	559	404
1211	6	6 Liver-1-40	1-40	370	401
1212	6	6 Liver-1-40	1-40	67	400
1213	6	6 Liver-1-40	1-40	528	396
1214	6	6 Liver-1-40	1-40	598	392
1215	6	6 Liver-1-40	1-40	43	391
1216	6	6 Liver-1-40	1-40	189	389
1217	6	6 Liver-1-40	1-40	238	388
1218	6	6 Liver-1-40	1-40	73	385
1219	6	6 Liver-1-40	1-40	686	383
1220	6	6 Liver-1-40	1-40	113	381
1221	6	6 Liver-1-40	1-40	277	380
1222	6	6 Liver-1-40	1-40	691	377
1223	6	6 Liver-1-40	1-40	719	376
1224	6	6 Liver-1-40	1-40	318	375
1225	6	6 Liver-1-40	1-40	108	371
1226	6	6 Liver-1-40	1-40	681	370
1227	6	6 Liver-1-40	1-40	347	369
1228	6	6 Liver-1-40	1-40	223	368
1229	6	6 Liver-1-40	1-40	45	365
1230	6	6 Liver-1-40	1-40	444	365
1231	6	6 Liver-1-40	1-40	734	365
1232	6	6 Liver-1-40	1-40	356	364
1233	6	6 Liver-1-40	1-40	23	359
1234	6	6 Liver-1-40	1-40	203	359
1235	6	6 Liver-1-40	1-40	625	357
1236	6	6 Liver-1-40	1-40	320	355
1237	6	6 Liver-1-40	1-40	302	352
1238	6	6 Liver-1-40	1-40	396	352
1239	6	6 Liver-1-40	1-40	535	352
1240	6	6 Liver-1-40	1-40	279	351
1241	6	6 Liver-1-40	1-40	678	350
1242	6	6 Liver-1-40	1-40	338	348
1243	6	6 Liver-1-40	1-40	610	348
1244	6	6 Liver-1-40	1-40	161	346
1245	6	6 Liver-1-40	1-40	265	346
1246	6	6 Liver-1-40	1-40	354	346
1247	6	6 Liver-1-40	1-40	655	346
1248	6	6 Liver-1-40	1-40	10	345
1249	6	6 Liver-1-40	1-40	564	344
1250	6	6 Liver-1-40	1-40	649	344
1251	6	6 Liver-1-40	1-40	288	343
1252	6	6 Liver-1-40	1-40	65	342
1253	6	6 Liver-1-40	1-40	737	342
1254	6	6 Liver-1-40	1-40	604	338
1255	6	6 Liver-1-40	1-40	12	337
1256	6	6 Liver-1-40	1-40	149	337
1257	6	6 Liver-1-40	1-40	2	335
1258	6	6 Liver-1-40	1-40	101	335
1259	6	6 Liver-1-40	1-40	180	335
1260	6	6 Liver-1-40	1-40	215	335
1261	6	6 Liver-1-40	1-40	94	333
1262	6	6 Liver-1-40	1-40	393	333
1263	6	6 Liver-1-40	1-40	571	331
1264	6	6 Liver-1-40	1-40	679	329
1265	6	6 Liver-1-40	1-40	538	328
1266	6	6 Liver-1-40	1-40	715	326
1267	6	6 Liver-1-40	1-40	465	322
1268	6	6 Liver-1-40	1-40	195	319
1269	6	6 Liver-1-40	1-40	242	318
1270	6	6 Liver-1-40	1-40	416	317
1271	6	6 Liver-1-40	1-40	613	317
1272	6	6 Liver-1-40	1-40	228	315
1273	6	6 Liver-1-40	1-40	237	315
1274	6	6 Liver-1-40	1-40	216	313
1275	6	6 Liver-1-40	1-40	397	312
1276	6	6 Liver-1-40	1-40	250	311
1277	6	6 Liver-1-40	1-40	574	309
1278	6	6 Liver-1-40	1-40	213	308
1279	6	6 Liver-1-40	1-40	367	308
1280	6	6 Liver-1-40	1-40	197	307
1281	6	6 Liver-1-40	1-40	55	306
1282	6	6 Liver-1-40	1-40	615	305
1283	6	6 Liver-1-40	1-40	92	304
1284	6	6 Liver-1-40	1-40	659	303
1285	6	6 Liver-1-40	1-40	176	301
1286	6	6 Liver-1-40	1-40	522	300
1287	6	6 Liver-1-40	1-40	152	299
1288	6	6 Liver-1-40	1-40	398	299
1289	6	6 Liver-1-40	1-40	692	298
1290	6	6 Liver-1-40	1-40	291	297
1291	6	6 Liver-1-40	1-40	296	297
1292	6	6 Liver-1-40	1-40	47	296
1293	6	6 Liver-1-40	1-40	573	294
1294	6	6 Liver-1-40	1-40	706	294
1295	6	6 Liver-1-40	1-40	263	292
1296	6	6 Liver-1-40	1-40	685	291
1297	6	6 Liver-1-40	1-40	637	290
1298	6	6 Liver-1-40	1-40	61	289
1299	6	6 Liver-1-40	1-40	365	289
1300	6	6 Liver-1-40	1-40	71	288
1301	6	6 Liver-1-40	1-40	421	288
1302	6	6 Liver-1-40	1-40	569	288
1303	6	6 Liver-1-40	1-40	144	286
1304	6	6 Liver-1-40	1-40	194	284
1305	6	6 Liver-1-40	1-40	373	284
1306	6	6 Liver-1-40	1-40	300	283
1307	6	6 Liver-1-40	1-40	276	282
1308	6	6 Liver-1-40	1-40	411	281
1309	6	6 Liver-1-40	1-40	42	278
1310	6	6 Liver-1-40	1-40	720	278
1311	6	6 Liver-1-40	1-40	56	277
1312	6	6 Liver-1-40	1-40	361	277
1313	6	6 Liver-1-40	1-40	525	276
1314	6	6 Liver-1-40	1-40	19	274
1315	6	6 Liver-1-40	1-40	687	274
1316	6	6 Liver-1-40	1-40	264	273
1317	6	6 Liver-1-40	1-40	165	272
1318	6	6 Liver-1-40	1-40	594	271
1319	6	6 Liver-1-40	1-40	704	271
1320	6	6 Liver-1-40	1-40	167	270
1321	6	6 Liver-1-40	1-40	181	270
1322	6	6 Liver-1-40	1-40	202	270
1323	6	6 Liver-1-40	1-40	158	268
1324	6	6 Liver-1-40	1-40	18	267
1325	6	6 Liver-1-40	1-40	619	267
1326	6	6 Liver-1-40	1-40	28	265
1327	6	6 Liver-1-40	1-40	90	265
1328	6	6 Liver-1-40	1-40	114	264
1329	6	6 Liver-1-40	1-40	622	264
1330	6	6 Liver-1-40	1-40	486	263
1331	6	6 Liver-1-40	1-40	627	263
1332	6	6 Liver-1-40	1-40	24	262
1333	6	6 Liver-1-40	1-40	48	262
1334	6	6 Liver-1-40	1-40	233	262
1335	6	6 Liver-1-40	1-40	669	261
1336	6	6 Liver-1-40	1-40	731	261
1337	6	6 Liver-1-40	1-40	359	260
1338	6	6 Liver-1-40	1-40	467	258
1339	6	6 Liver-1-40	1-40	588	258
1340	6	6 Liver-1-40	1-40	656	257
1341	6	6 Liver-1-40	1-40	533	256
1342	6	6 Liver-1-40	1-40	578	256
1343	6	6 Liver-1-40	1-40	722	255
1344	6	6 Liver-1-40	1-40	602	253
1345	6	6 Liver-1-40	1-40	84	252
1346	6	6 Liver-1-40	1-40	331	252
1347	6	6 Liver-1-40	1-40	115	250
1348	6	6 Liver-1-40	1-40	357	250
1349	6	6 Liver-1-40	1-40	511	250
1350	6	6 Liver-1-40	1-40	616	250
1351	6	6 Liver-1-40	1-40	405	249
1352	6	6 Liver-1-40	1-40	325	248
1353	6	6 Liver-1-40	1-40	150	247
1354	6	6 Liver-1-40	1-40	252	246
1355	6	6 Liver-1-40	1-40	387	243
1356	6	6 Liver-1-40	1-40	388	243
1357	6	6 Liver-1-40	1-40	289	242
1358	6	6 Liver-1-40	1-40	192	241
1359	6	6 Liver-1-40	1-40	184	240
1360	6	6 Liver-1-40	1-40	536	240
1361	6	6 Liver-1-40	1-40	199	239
1362	6	6 Liver-1-40	1-40	402	239
1363	6	6 Liver-1-40	1-40	457	239
1364	6	6 Liver-1-40	1-40	581	239
1365	6	6 Liver-1-40	1-40	743	239
1366	6	6 Liver-1-40	1-40	549	238
1367	6	6 Liver-1-40	1-40	672	236
1368	6	6 Liver-1-40	1-40	711	236
1369	6	6 Liver-1-40	1-40	160	234
1370	6	6 Liver-1-40	1-40	173	234
1371	6	6 Liver-1-40	1-40	282	234
1372	6	6 Liver-1-40	1-40	557	234
1373	6	6 Liver-1-40	1-40	57	231
1374	6	6 Liver-1-40	1-40	125	230
1375	6	6 Liver-1-40	1-40	316	229
1376	6	6 Liver-1-40	1-40	725	229
1377	6	6 Liver-1-40	1-40	674	228
1378	6	6 Liver-1-40	1-40	633	226
1379	6	6 Liver-1-40	1-40	49	224
1380	6	6 Liver-1-40	1-40	109	224
1381	6	6 Liver-1-40	1-40	432	224
1382	6	6 Liver-1-40	1-40	478	224
1383	6	6 Liver-1-40	1-40	513	223
1384	6	6 Liver-1-40	1-40	208	222
1385	6	6 Liver-1-40	1-40	221	222
1386	6	6 Liver-1-40	1-40	317	222
1387	6	6 Liver-1-40	1-40	597	221
1388	6	6 Liver-1-40	1-40	126	219
1389	6	6 Liver-1-40	1-40	3	217
1390	6	6 Liver-1-40	1-40	7	216
1391	6	6 Liver-1-40	1-40	516	215
1392	6	6 Liver-1-40	1-40	321	214
1393	6	6 Liver-1-40	1-40	504	214
1394	6	6 Liver-1-40	1-40	544	214
1395	6	6 Liver-1-40	1-40	412	213
1396	6	6 Liver-1-40	1-40	414	213
1397	6	6 Liver-1-40	1-40	30	212
1398	6	6 Liver-1-40	1-40	640	212
1399	6	6 Liver-1-40	1-40	375	210
1400	6	6 Liver-1-40	1-40	285	209
1401	6	6 Liver-1-40	1-40	462	209
1402	6	6 Liver-1-40	1-40	461	208
1403	6	6 Liver-1-40	1-40	496	208
1404	6	6 Liver-1-40	1-40	554	208
1405	6	6 Liver-1-40	1-40	273	207
1406	6	6 Liver-1-40	1-40	665	207
1407	6	6 Liver-1-40	1-40	274	206
1408	6	6 Liver-1-40	1-40	742	206
1409	6	6 Liver-1-40	1-40	660	205
1410	6	6 Liver-1-40	1-40	587	203
1411	6	6 Liver-1-40	1-40	341	202
1412	6	6 Liver-1-40	1-40	451	202
1413	6	6 Liver-1-40	1-40	352	201
1414	6	6 Liver-1-40	1-40	730	201
1415	6	6 Liver-1-40	1-40	406	199
1416	6	6 Liver-1-40	1-40	548	199
1417	6	6 Liver-1-40	1-40	641	198
1418	6	6 Liver-1-40	1-40	658	198
1419	6	6 Liver-1-40	1-40	448	197
1420	6	6 Liver-1-40	1-40	526	197
1421	6	6 Liver-1-40	1-40	22	196
1422	6	6 Liver-1-40	1-40	143	195
1423	6	6 Liver-1-40	1-40	182	195
1424	6	6 Liver-1-40	1-40	374	195
1425	6	6 Liver-1-40	1-40	550	195
1426	6	6 Liver-1-40	1-40	713	195
1427	6	6 Liver-1-40	1-40	684	194
1428	6	6 Liver-1-40	1-40	729	194
1429	6	6 Liver-1-40	1-40	253	193
1430	6	6 Liver-1-40	1-40	140	192
1431	6	6 Liver-1-40	1-40	468	191
1432	6	6 Liver-1-40	1-40	664	191
1433	6	6 Liver-1-40	1-40	629	190
1434	6	6 Liver-1-40	1-40	147	188
1435	6	6 Liver-1-40	1-40	521	188
1436	6	6 Liver-1-40	1-40	723	188
1437	6	6 Liver-1-40	1-40	146	185
1438	6	6 Liver-1-40	1-40	509	185
1439	6	6 Liver-1-40	1-40	185	183
1440	6	6 Liver-1-40	1-40	492	183
1441	6	6 Liver-1-40	1-40	607	182
1442	6	6 Liver-1-40	1-40	643	182
1443	6	6 Liver-1-40	1-40	105	181
1444	6	6 Liver-1-40	1-40	313	181
1445	6	6 Liver-1-40	1-40	438	181
1446	6	6 Liver-1-40	1-40	463	181
1447	6	6 Liver-1-40	1-40	123	180
1448	6	6 Liver-1-40	1-40	657	179
1449	6	6 Liver-1-40	1-40	429	178
1450	6	6 Liver-1-40	1-40	135	177
1451	6	6 Liver-1-40	1-40	168	177
1452	6	6 Liver-1-40	1-40	297	176
1453	6	6 Liver-1-40	1-40	245	174
1454	6	6 Liver-1-40	1-40	227	172
1455	6	6 Liver-1-40	1-40	599	171
1456	6	6 Liver-1-40	1-40	618	171
1457	6	6 Liver-1-40	1-40	162	170
1458	6	6 Liver-1-40	1-40	198	170
1459	6	6 Liver-1-40	1-40	358	170
1460	6	6 Liver-1-40	1-40	540	170
1461	6	6 Liver-1-40	1-40	399	169
1462	6	6 Liver-1-40	1-40	424	168
1463	6	6 Liver-1-40	1-40	493	168
1464	6	6 Liver-1-40	1-40	623	168
1465	6	6 Liver-1-40	1-40	96	167
1466	6	6 Liver-1-40	1-40	419	167
1467	6	6 Liver-1-40	1-40	689	166
1468	6	6 Liver-1-40	1-40	732	166
1469	6	6 Liver-1-40	1-40	98	165
1470	6	6 Liver-1-40	1-40	129	165
1471	6	6 Liver-1-40	1-40	130	165
1472	6	6 Liver-1-40	1-40	736	164
1473	6	6 Liver-1-40	1-40	218	163
1474	6	6 Liver-1-40	1-40	335	163
1475	6	6 Liver-1-40	1-40	324	162
1476	6	6 Liver-1-40	1-40	519	160
1477	6	6 Liver-1-40	1-40	600	160
1478	6	6 Liver-1-40	1-40	34	159
1479	6	6 Liver-1-40	1-40	142	159
1480	6	6 Liver-1-40	1-40	201	159
1481	6	6 Liver-1-40	1-40	446	159
1482	6	6 Liver-1-40	1-40	466	159
1483	6	6 Liver-1-40	1-40	739	159
1484	6	6 Liver-1-40	1-40	133	158
1485	6	6 Liver-1-40	1-40	155	158
1486	6	6 Liver-1-40	1-40	688	158
1487	6	6 Liver-1-40	1-40	368	157
1488	6	6 Liver-1-40	1-40	301	156
1489	6	6 Liver-1-40	1-40	307	156
1490	6	6 Liver-1-40	1-40	53	155
1491	6	6 Liver-1-40	1-40	85	155
1492	6	6 Liver-1-40	1-40	394	155
1493	6	6 Liver-1-40	1-40	699	154
1494	6	6 Liver-1-40	1-40	31	153
1495	6	6 Liver-1-40	1-40	567	153
1496	6	6 Liver-1-40	1-40	44	152
1497	6	6 Liver-1-40	1-40	378	152
1498	6	6 Liver-1-40	1-40	366	151
1499	6	6 Liver-1-40	1-40	721	151
1500	6	6 Liver-1-40	1-40	498	150
1501	6	6 Liver-1-40	1-40	652	150
1502	6	6 Liver-1-40	1-40	718	150
1503	6	6 Liver-1-40	1-40	383	149
1504	6	6 Liver-1-40	1-40	605	149
1505	6	6 Liver-1-40	1-40	668	149
1506	6	6 Liver-1-40	1-40	93	148
1507	6	6 Liver-1-40	1-40	134	148
1508	6	6 Liver-1-40	1-40	500	147
1509	6	6 Liver-1-40	1-40	553	147
1510	6	6 Liver-1-40	1-40	583	147
1511	6	6 Liver-1-40	1-40	290	146
1512	6	6 Liver-1-40	1-40	635	146
1513	6	6 Liver-1-40	1-40	232	145
1514	6	6 Liver-1-40	1-40	315	145
1515	6	6 Liver-1-40	1-40	349	144
1516	6	6 Liver-1-40	1-40	479	144
1517	6	6 Liver-1-40	1-40	707	144
1518	6	6 Liver-1-40	1-40	322	143
1519	6	6 Liver-1-40	1-40	128	142
1520	6	6 Liver-1-40	1-40	157	142
1521	6	6 Liver-1-40	1-40	164	142
1522	6	6 Liver-1-40	1-40	423	142
1523	6	6 Liver-1-40	1-40	433	142
1524	6	6 Liver-1-40	1-40	107	141
1525	6	6 Liver-1-40	1-40	330	141
1526	6	6 Liver-1-40	1-40	690	141
1527	6	6 Liver-1-40	1-40	156	140
1528	6	6 Liver-1-40	1-40	452	140
1529	6	6 Liver-1-40	1-40	630	140
1530	6	6 Liver-1-40	1-40	6	138
1531	6	6 Liver-1-40	1-40	654	138
1532	6	6 Liver-1-40	1-40	220	137
1533	6	6 Liver-1-40	1-40	726	137
1534	6	6 Liver-1-40	1-40	191	136
1535	6	6 Liver-1-40	1-40	422	136
1536	6	6 Liver-1-40	1-40	442	136
1537	6	6 Liver-1-40	1-40	447	136
1538	6	6 Liver-1-40	1-40	693	135
1539	6	6 Liver-1-40	1-40	409	133
1540	6	6 Liver-1-40	1-40	437	133
1541	6	6 Liver-1-40	1-40	99	131
1542	6	6 Liver-1-40	1-40	740	131
1543	6	6 Liver-1-40	1-40	530	128
1544	6	6 Liver-1-40	1-40	27	127
1545	6	6 Liver-1-40	1-40	171	127
1546	6	6 Liver-1-40	1-40	25	126
1547	6	6 Liver-1-40	1-40	39	125
1548	6	6 Liver-1-40	1-40	72	125
1549	6	6 Liver-1-40	1-40	369	125
1550	6	6 Liver-1-40	1-40	566	124
1551	6	6 Liver-1-40	1-40	644	124
1552	6	6 Liver-1-40	1-40	20	123
1553	6	6 Liver-1-40	1-40	102	123
1554	6	6 Liver-1-40	1-40	485	123
1555	6	6 Liver-1-40	1-40	431	121
1556	6	6 Liver-1-40	1-40	568	121
1557	6	6 Liver-1-40	1-40	255	118
1558	6	6 Liver-1-40	1-40	488	118
1559	6	6 Liver-1-40	1-40	464	117
1560	6	6 Liver-1-40	1-40	480	117
1561	6	6 Liver-1-40	1-40	116	116
1562	6	6 Liver-1-40	1-40	137	116
1563	6	6 Liver-1-40	1-40	346	116
1564	6	6 Liver-1-40	1-40	502	116
1565	6	6 Liver-1-40	1-40	284	115
1566	6	6 Liver-1-40	1-40	293	115
1567	6	6 Liver-1-40	1-40	385	115
1568	6	6 Liver-1-40	1-40	392	115
1569	6	6 Liver-1-40	1-40	211	114
1570	6	6 Liver-1-40	1-40	281	114
1571	6	6 Liver-1-40	1-40	404	114
1572	6	6 Liver-1-40	1-40	503	114
1573	6	6 Liver-1-40	1-40	547	114
1574	6	6 Liver-1-40	1-40	482	113
1575	6	6 Liver-1-40	1-40	636	113
1576	6	6 Liver-1-40	1-40	229	112
1577	6	6 Liver-1-40	1-40	240	111
1578	6	6 Liver-1-40	1-40	436	111
1579	6	6 Liver-1-40	1-40	645	111
1580	6	6 Liver-1-40	1-40	666	110
1581	6	6 Liver-1-40	1-40	112	109
1582	6	6 Liver-1-40	1-40	241	109
1583	6	6 Liver-1-40	1-40	362	109
1584	6	6 Liver-1-40	1-40	420	109
1585	6	6 Liver-1-40	1-40	269	108
1586	6	6 Liver-1-40	1-40	292	108
1587	6	6 Liver-1-40	1-40	304	108
1588	6	6 Liver-1-40	1-40	663	108
1589	6	6 Liver-1-40	1-40	106	107
1590	6	6 Liver-1-40	1-40	183	107
1591	6	6 Liver-1-40	1-40	469	107
1592	6	6 Liver-1-40	1-40	624	107
1593	6	6 Liver-1-40	1-40	709	107
1594	6	6 Liver-1-40	1-40	712	107
1595	6	6 Liver-1-40	1-40	66	106
1596	6	6 Liver-1-40	1-40	278	105
1597	6	6 Liver-1-40	1-40	696	105
1598	6	6 Liver-1-40	1-40	77	104
1599	6	6 Liver-1-40	1-40	177	104
1600	6	6 Liver-1-40	1-40	305	104
1601	6	6 Liver-1-40	1-40	410	104
1602	6	6 Liver-1-40	1-40	510	104
1603	6	6 Liver-1-40	1-40	154	103
1604	6	6 Liver-1-40	1-40	327	103
1605	6	6 Liver-1-40	1-40	329	103
1606	6	6 Liver-1-40	1-40	474	103
1607	6	6 Liver-1-40	1-40	555	103
1608	6	6 Liver-1-40	1-40	136	102
1609	6	6 Liver-1-40	1-40	159	102
1610	6	6 Liver-1-40	1-40	204	102
1611	6	6 Liver-1-40	1-40	717	101
1612	6	6 Liver-1-40	1-40	728	101
1613	6	6 Liver-1-40	1-40	744	101
1614	6	6 Liver-1-40	1-40	193	100
1615	7	7 Liver-1-40	1-40	35	29641
1616	7	7 Liver-1-40	1-40	65	21965
1617	7	7 Liver-1-40	1-40	15	21454
1618	7	7 Liver-1-40	1-40	7	19952
1619	7	7 Liver-1-40	1-40	49	19861
1620	7	7 Liver-1-40	1-40	46	16657
1621	7	7 Liver-1-40	1-40	8	14480
1622	7	7 Liver-1-40	1-40	21	14479
1623	7	7 Liver-1-40	1-40	66	12865
1624	7	7 Liver-1-40	1-40	73	11591
1625	7	7 Liver-1-40	1-40	1	11296
1626	7	7 Liver-1-40	1-40	59	11234
1627	7	7 Liver-1-40	1-40	36	11160
1628	7	7 Liver-1-40	1-40	61	8653
1629	7	7 Liver-1-40	1-40	72	7534
1630	7	7 Liver-1-40	1-40	10	7190
1631	7	7 Liver-1-40	1-40	13	7156
1632	7	7 Liver-1-40	1-40	41	6841
1633	7	7 Liver-1-40	1-40	5	6134
1634	7	7 Liver-1-40	1-40	52	6024
1635	7	7 Liver-1-40	1-40	71	5756
1636	7	7 Liver-1-40	1-40	24	5543
1637	7	7 Liver-1-40	1-40	37	5509
1638	7	7 Liver-1-40	1-40	9	5142
1639	7	7 Liver-1-40	1-40	4	5005
1640	7	7 Liver-1-40	1-40	58	4999
1641	7	7 Liver-1-40	1-40	47	4855
1642	7	7 Liver-1-40	1-40	12	4826
1643	7	7 Liver-1-40	1-40	68	4488
1644	7	7 Liver-1-40	1-40	22	4274
1645	7	7 Liver-1-40	1-40	69	4098
1646	7	7 Liver-1-40	1-40	16	3884
1647	7	7 Liver-1-40	1-40	34	3877
1648	7	7 Liver-1-40	1-40	30	3702
1649	7	7 Liver-1-40	1-40	19	3365
1650	7	7 Liver-1-40	1-40	53	3318
1651	7	7 Liver-1-40	1-40	40	3130
1652	7	7 Liver-1-40	1-40	38	3039
1653	7	7 Liver-1-40	1-40	67	2940
1654	7	7 Liver-1-40	1-40	50	2733
1655	7	7 Liver-1-40	1-40	26	2711
1656	7	7 Liver-1-40	1-40	48	2532
1657	7	7 Liver-1-40	1-40	25	2469
1658	7	7 Liver-1-40	1-40	70	2403
1659	7	7 Liver-1-40	1-40	11	2379
1660	7	7 Liver-1-40	1-40	29	2256
1661	7	7 Liver-1-40	1-40	63	2177
1662	7	7 Liver-1-40	1-40	43	2157
1663	7	7 Liver-1-40	1-40	14	2058
1664	7	7 Liver-1-40	1-40	31	1876
1665	7	7 Liver-1-40	1-40	3	1867
1666	7	7 Liver-1-40	1-40	2	1810
1667	7	7 Liver-1-40	1-40	42	1795
1668	7	7 Liver-1-40	1-40	54	1731
1669	7	7 Liver-1-40	1-40	44	1683
1670	7	7 Liver-1-40	1-40	20	1494
1671	7	7 Liver-1-40	1-40	33	1492
1672	7	7 Liver-1-40	1-40	27	1420
1673	7	7 Liver-1-40	1-40	51	1412
1674	7	7 Liver-1-40	1-40	28	1380
1675	7	7 Liver-1-40	1-40	17	1302
1676	7	7 Liver-1-40	1-40	62	1291
1677	7	7 Liver-1-40	1-40	74	1230
1678	7	7 Liver-1-40	1-40	64	1199
1679	7	7 Liver-1-40	1-40	39	1157
1680	7	7 Liver-1-40	1-40	6	1153
1681	7	7 Liver-1-40	1-40	45	1126
1682	7	7 Liver-1-40	1-40	60	1114
1683	7	7 Liver-1-40	1-40	57	1106
1684	7	7 Liver-1-40	1-40	55	1065
1685	7	7 Liver-1-40	1-40	56	1032
1686	7	7 Liver-1-40	1-40	18	1029
1687	7	7 Liver-1-40	1-40	23	1013
1688	7	7 Liver-1-40	1-40	32	1005
1689	9	9 Liver-1-40	1-40	2271	56891
1690	9	9 Liver-1-40	1-40	458	53785
1691	9	9 Liver-1-40	1-40	3570	52635
1692	9	9 Liver-1-40	1-40	8086	49905
1693	9	9 Liver-1-40	1-40	814	48076
1694	9	9 Liver-1-40	1-40	1746	42810
1695	9	9 Liver-1-40	1-40	1648	39736
1696	9	9 Liver-1-40	1-40	973	35318
1697	9	9 Liver-1-40	1-40	3017	34964
1698	9	9 Liver-1-40	1-40	2860	32066
1699	9	9 Liver-1-40	1-40	387	31998
1700	9	9 Liver-1-40	1-40	2275	31660
1701	9	9 Liver-1-40	1-40	6876	30802
1702	9	9 Liver-1-40	1-40	1174	30609
1703	9	9 Liver-1-40	1-40	6575	30145
1704	9	9 Liver-1-40	1-40	6861	29960
1705	9	9 Liver-1-40	1-40	1708	29581
1706	9	9 Liver-1-40	1-40	644	29329
1707	9	9 Liver-1-40	1-40	399	28509
1708	9	9 Liver-1-40	1-40	7173	27972
1709	9	9 Liver-1-40	1-40	6679	27579
1710	9	9 Liver-1-40	1-40	6294	27217
1711	9	9 Liver-1-40	1-40	2841	27023
1712	9	9 Liver-1-40	1-40	7729	26398
1713	9	9 Liver-1-40	1-40	752	26179
1714	9	9 Liver-1-40	1-40	5512	24631
1715	9	9 Liver-1-40	1-40	5295	24351
1716	9	9 Liver-1-40	1-40	636	24221
1717	9	9 Liver-1-40	1-40	7997	23913
1718	9	9 Liver-1-40	1-40	669	23786
1719	9	9 Liver-1-40	1-40	6634	22125
1720	9	9 Liver-1-40	1-40	5239	22026
1721	9	9 Liver-1-40	1-40	6957	21641
1722	9	9 Liver-1-40	1-40	7970	21016
1723	9	9 Liver-1-40	1-40	1200	20950
1724	9	9 Liver-1-40	1-40	4470	20941
1725	9	9 Liver-1-40	1-40	2526	20884
1726	9	9 Liver-1-40	1-40	6395	20414
1727	9	9 Liver-1-40	1-40	7958	19830
1728	9	9 Liver-1-40	1-40	2873	19285
1729	9	9 Liver-1-40	1-40	6351	19243
1730	9	9 Liver-1-40	1-40	920	18944
1731	9	9 Liver-1-40	1-40	6555	18381
1732	9	9 Liver-1-40	1-40	8089	18184
1733	9	9 Liver-1-40	1-40	6109	18119
1734	9	9 Liver-1-40	1-40	2198	18115
1735	9	9 Liver-1-40	1-40	1989	18017
1736	9	9 Liver-1-40	1-40	1760	17765
1737	9	9 Liver-1-40	1-40	2065	17635
1738	9	9 Liver-1-40	1-40	4375	17626
1739	9	9 Liver-1-40	1-40	6599	17451
1740	9	9 Liver-1-40	1-40	8090	17039
1741	9	9 Liver-1-40	1-40	641	16761
1742	9	9 Liver-1-40	1-40	7229	16382
1743	9	9 Liver-1-40	1-40	1001	16194
1744	9	9 Liver-1-40	1-40	6669	16183
1745	9	9 Liver-1-40	1-40	236	16079
1746	9	9 Liver-1-40	1-40	6966	15961
1747	9	9 Liver-1-40	1-40	4492	15274
1748	9	9 Liver-1-40	1-40	2354	15092
1749	9	9 Liver-1-40	1-40	4641	15005
1750	9	9 Liver-1-40	1-40	674	14977
1751	9	9 Liver-1-40	1-40	5126	14940
1752	9	9 Liver-1-40	1-40	6327	14718
1753	9	9 Liver-1-40	1-40	3498	14607
1754	9	9 Liver-1-40	1-40	7604	14595
1755	9	9 Liver-1-40	1-40	394	14565
1756	9	9 Liver-1-40	1-40	2993	14289
1757	9	9 Liver-1-40	1-40	5424	14088
1758	9	9 Liver-1-40	1-40	6455	13972
1759	9	9 Liver-1-40	1-40	1546	13924
1760	9	9 Liver-1-40	1-40	8026	13806
1761	9	9 Liver-1-40	1-40	1843	13613
1762	9	9 Liver-1-40	1-40	372	13491
1763	9	9 Liver-1-40	1-40	608	13224
1764	9	9 Liver-1-40	1-40	6532	13168
1765	9	9 Liver-1-40	1-40	8555	13140
1766	9	9 Liver-1-40	1-40	2642	12863
1767	9	9 Liver-1-40	1-40	6013	12663
1768	9	9 Liver-1-40	1-40	6281	12659
1769	9	9 Liver-1-40	1-40	5217	12653
1770	9	9 Liver-1-40	1-40	3649	12538
1771	9	9 Liver-1-40	1-40	3844	12433
1772	9	9 Liver-1-40	1-40	1418	12181
1773	9	9 Liver-1-40	1-40	4509	11955
1774	9	9 Liver-1-40	1-40	783	11771
1775	9	9 Liver-1-40	1-40	5843	11766
1776	9	9 Liver-1-40	1-40	5148	11654
1777	9	9 Liver-1-40	1-40	858	11590
1778	9	9 Liver-1-40	1-40	2780	11497
1779	9	9 Liver-1-40	1-40	4265	11395
1780	9	9 Liver-1-40	1-40	4018	11328
1781	9	9 Liver-1-40	1-40	1370	11266
1782	9	9 Liver-1-40	1-40	5754	10743
1783	9	9 Liver-1-40	1-40	244	10674
1784	9	9 Liver-1-40	1-40	3994	10555
1785	9	9 Liver-1-40	1-40	3037	10543
1786	9	9 Liver-1-40	1-40	8438	10189
1787	9	9 Liver-1-40	1-40	331	10100
1788	9	9 Liver-1-40	1-40	3548	10073
1789	9	9 Liver-1-40	1-40	492	10070
1790	9	9 Liver-1-40	1-40	4416	9622
1791	9	9 Liver-1-40	1-40	5594	9600
1792	9	9 Liver-1-40	1-40	5901	9418
1793	9	9 Liver-1-40	1-40	7350	9401
1794	9	9 Liver-1-40	1-40	6882	9361
1795	9	9 Liver-1-40	1-40	5511	9277
1796	9	9 Liver-1-40	1-40	6540	9261
1797	9	9 Liver-1-40	1-40	7549	9130
1798	9	9 Liver-1-40	1-40	1385	9106
1799	9	9 Liver-1-40	1-40	2764	9088
1800	9	9 Liver-1-40	1-40	5034	8774
1801	9	9 Liver-1-40	1-40	4423	8743
1802	9	9 Liver-1-40	1-40	7226	8733
1803	9	9 Liver-1-40	1-40	3656	8637
1804	9	9 Liver-1-40	1-40	5182	8547
1805	9	9 Liver-1-40	1-40	462	8412
1806	9	9 Liver-1-40	1-40	2424	8255
1807	9	9 Liver-1-40	1-40	1573	8213
1808	9	9 Liver-1-40	1-40	4268	8181
1809	9	9 Liver-1-40	1-40	3045	8159
1810	9	9 Liver-1-40	1-40	2877	8098
1811	9	9 Liver-1-40	1-40	1893	7937
1812	9	9 Liver-1-40	1-40	3723	7876
1813	9	9 Liver-1-40	1-40	1540	7766
1814	9	9 Liver-1-40	1-40	7556	7709
1815	9	9 Liver-1-40	1-40	2733	7662
1816	9	9 Liver-1-40	1-40	7846	7539
1817	9	9 Liver-1-40	1-40	4717	7527
1818	9	9 Liver-1-40	1-40	8020	7139
1819	9	9 Liver-1-40	1-40	3189	7074
1820	9	9 Liver-1-40	1-40	1399	7072
1821	9	9 Liver-1-40	1-40	2685	7059
1822	9	9 Liver-1-40	1-40	1969	7058
1823	9	9 Liver-1-40	1-40	6263	7055
1824	9	9 Liver-1-40	1-40	3236	6948
1825	9	9 Liver-1-40	1-40	1366	6895
1826	9	9 Liver-1-40	1-40	6231	6884
1827	9	9 Liver-1-40	1-40	6748	6636
1828	9	9 Liver-1-40	1-40	6289	6539
1829	9	9 Liver-1-40	1-40	6230	6463
1830	9	9 Liver-1-40	1-40	6132	6460
1831	9	9 Liver-1-40	1-40	4246	6385
1832	9	9 Liver-1-40	1-40	6580	6287
1833	9	9 Liver-1-40	1-40	6219	6255
1834	9	9 Liver-1-40	1-40	1145	6212
1835	9	9 Liver-1-40	1-40	7368	5990
1836	9	9 Liver-1-40	1-40	3669	5941
1837	9	9 Liver-1-40	1-40	3738	5873
1838	9	9 Liver-1-40	1-40	2296	5515
1839	9	9 Liver-1-40	1-40	5212	5458
1840	9	9 Liver-1-40	1-40	2498	5396
1841	9	9 Liver-1-40	1-40	7189	5255
1842	9	9 Liver-1-40	1-40	6547	5236
1843	9	9 Liver-1-40	1-40	6333	5218
1844	9	9 Liver-1-40	1-40	5640	5149
1845	9	9 Liver-1-40	1-40	730	5085
1846	9	9 Liver-1-40	1-40	7014	5017
1847	9	9 Liver-1-40	1-40	6495	4976
1848	9	9 Liver-1-40	1-40	6762	4957
1849	9	9 Liver-1-40	1-40	6921	4941
1850	9	9 Liver-1-40	1-40	5044	4894
1851	9	9 Liver-1-40	1-40	4645	4840
1852	9	9 Liver-1-40	1-40	3902	4680
1853	9	9 Liver-1-40	1-40	1711	4609
1854	9	9 Liver-1-40	1-40	683	4515
1855	9	9 Liver-1-40	1-40	2182	4415
1856	9	9 Liver-1-40	1-40	97	4395
1857	9	9 Liver-1-40	1-40	4025	4390
1858	9	9 Liver-1-40	1-40	4723	4293
1859	9	9 Liver-1-40	1-40	1830	4266
1860	9	9 Liver-1-40	1-40	3478	4225
1861	9	9 Liver-1-40	1-40	6675	4167
1862	9	9 Liver-1-40	1-40	8408	4157
1863	9	9 Liver-1-40	1-40	3746	4153
1864	9	9 Liver-1-40	1-40	8124	4134
1865	9	9 Liver-1-40	1-40	7871	3984
1866	9	9 Liver-1-40	1-40	1974	3924
1867	9	9 Liver-1-40	1-40	7955	3916
1868	9	9 Liver-1-40	1-40	2074	3898
1869	9	9 Liver-1-40	1-40	6961	3896
1870	9	9 Liver-1-40	1-40	6144	3839
1871	9	9 Liver-1-40	1-40	317	3771
1872	9	9 Liver-1-40	1-40	1619	3704
1873	9	9 Liver-1-40	1-40	2430	3685
1874	9	9 Liver-1-40	1-40	5872	3661
1875	9	9 Liver-1-40	1-40	6947	3647
1876	9	9 Liver-1-40	1-40	5629	3603
1877	9	9 Liver-1-40	1-40	5797	3495
1878	9	9 Liver-1-40	1-40	5951	3494
1879	9	9 Liver-1-40	1-40	8671	3467
1880	9	9 Liver-1-40	1-40	3668	3436
1881	9	9 Liver-1-40	1-40	1096	3433
1882	9	9 Liver-1-40	1-40	3204	3346
1883	9	9 Liver-1-40	1-40	7779	3339
1884	9	9 Liver-1-40	1-40	6494	3240
1885	9	9 Liver-1-40	1-40	8329	3176
1886	9	9 Liver-1-40	1-40	3933	3160
1887	9	9 Liver-1-40	1-40	6714	3152
1888	9	9 Liver-1-40	1-40	1520	3029
1889	9	9 Liver-1-40	1-40	7590	3016
1890	9	9 Liver-1-40	1-40	3971	2985
1891	9	9 Liver-1-40	1-40	6353	2976
1892	9	9 Liver-1-40	1-40	1424	2933
1893	9	9 Liver-1-40	1-40	8638	2889
1894	9	9 Liver-1-40	1-40	3527	2855
1895	9	9 Liver-1-40	1-40	3275	2800
1896	9	9 Liver-1-40	1-40	6345	2781
1897	9	9 Liver-1-40	1-40	2575	2777
1898	9	9 Liver-1-40	1-40	4130	2777
1899	9	9 Liver-1-40	1-40	8578	2755
1900	9	9 Liver-1-40	1-40	4683	2661
1901	9	9 Liver-1-40	1-40	4845	2627
1902	9	9 Liver-1-40	1-40	589	2583
1903	9	9 Liver-1-40	1-40	7383	2520
1904	9	9 Liver-1-40	1-40	6292	2515
1905	9	9 Liver-1-40	1-40	7565	2430
1906	9	9 Liver-1-40	1-40	6997	2409
1907	9	9 Liver-1-40	1-40	4966	2393
1908	9	9 Liver-1-40	1-40	2377	2391
1909	9	9 Liver-1-40	1-40	2364	2345
1910	9	9 Liver-1-40	1-40	1997	2337
1911	9	9 Liver-1-40	1-40	6081	2321
1912	9	9 Liver-1-40	1-40	7698	2264
1913	9	9 Liver-1-40	1-40	6112	2244
1914	9	9 Liver-1-40	1-40	6928	2206
1915	9	9 Liver-1-40	1-40	7895	2184
1916	9	9 Liver-1-40	1-40	7301	2117
1917	9	9 Liver-1-40	1-40	6140	2102
1918	9	9 Liver-1-40	1-40	4445	2092
1919	9	9 Liver-1-40	1-40	6972	2000
1920	9	9 Liver-1-40	1-40	8244	1955
1921	9	9 Liver-1-40	1-40	3336	1786
1922	9	9 Liver-1-40	1-40	4811	1756
1923	9	9 Liver-1-40	1-40	410	1753
1924	9	9 Liver-1-40	1-40	4485	1753
1925	9	9 Liver-1-40	1-40	1873	1749
1926	9	9 Liver-1-40	1-40	3391	1643
1927	9	9 Liver-1-40	1-40	5386	1625
1928	9	9 Liver-1-40	1-40	3056	1608
1929	9	9 Liver-1-40	1-40	8331	1578
1930	9	9 Liver-1-40	1-40	6790	1533
1931	9	9 Liver-1-40	1-40	6867	1531
1932	9	9 Liver-1-40	1-40	4530	1524
1933	9	9 Liver-1-40	1-40	5545	1482
1934	9	9 Liver-1-40	1-40	6936	1479
1935	9	9 Liver-1-40	1-40	7374	1473
1936	9	9 Liver-1-40	1-40	7944	1470
1937	9	9 Liver-1-40	1-40	5132	1452
1938	9	9 Liver-1-40	1-40	2698	1399
1939	9	9 Liver-1-40	1-40	3063	1398
1940	9	9 Liver-1-40	1-40	1255	1381
1941	9	9 Liver-1-40	1-40	8316	1359
1942	9	9 Liver-1-40	1-40	6396	1358
1943	9	9 Liver-1-40	1-40	153	1357
1944	9	9 Liver-1-40	1-40	8384	1356
1945	9	9 Liver-1-40	1-40	2342	1330
1946	9	9 Liver-1-40	1-40	933	1329
1947	9	9 Liver-1-40	1-40	1614	1298
1948	9	9 Liver-1-40	1-40	8319	1289
1949	9	9 Liver-1-40	1-40	4135	1278
1950	9	9 Liver-1-40	1-40	7651	1269
1951	9	9 Liver-1-40	1-40	4172	1265
1952	9	9 Liver-1-40	1-40	8042	1250
1953	9	9 Liver-1-40	1-40	4215	1235
1954	9	9 Liver-1-40	1-40	7588	1170
1955	9	9 Liver-1-40	1-40	5477	1160
1956	9	9 Liver-1-40	1-40	2656	1142
1957	9	9 Liver-1-40	1-40	6027	1141
1958	9	9 Liver-1-40	1-40	3689	1136
1959	9	9 Liver-1-40	1-40	2097	1135
1960	9	9 Liver-1-40	1-40	4339	1129
1961	9	9 Liver-1-40	1-40	1429	1104
1962	9	9 Liver-1-40	1-40	8197	1102
1963	9	9 Liver-1-40	1-40	597	1074
1964	9	9 Liver-1-40	1-40	2039	1073
1965	9	9 Liver-1-40	1-40	7362	1061
1966	9	9 Liver-1-40	1-40	7304	1059
1967	9	9 Liver-1-40	1-40	2729	1037
1968	9	9 Liver-1-40	1-40	7783	1022
1969	9	9 Liver-1-40	1-40	904	1020
1970	10	10 Liver-1-40	1-40	89	36137
1971	10	10 Liver-1-40	1-40	42	31215
1972	10	10 Liver-1-40	1-40	124	30629
1973	10	10 Liver-1-40	1-40	169	27990
1974	10	10 Liver-1-40	1-40	130	24740
1975	10	10 Liver-1-40	1-40	88	24532
1976	10	10 Liver-1-40	1-40	5	23409
1977	10	10 Liver-1-40	1-40	226	23047
1978	10	10 Liver-1-40	1-40	81	22904
1979	10	10 Liver-1-40	1-40	211	22748
1980	10	10 Liver-1-40	1-40	11	22425
1981	10	10 Liver-1-40	1-40	102	22251
1982	10	10 Liver-1-40	1-40	203	21864
1983	10	10 Liver-1-40	1-40	187	21234
1984	10	10 Liver-1-40	1-40	115	19973
1985	10	10 Liver-1-40	1-40	41	19706
1986	10	10 Liver-1-40	1-40	206	19048
1987	10	10 Liver-1-40	1-40	146	18828
1988	10	10 Liver-1-40	1-40	19	18582
1989	10	10 Liver-1-40	1-40	208	18418
1990	10	10 Liver-1-40	1-40	154	18306
1991	10	10 Liver-1-40	1-40	139	18286
1992	10	10 Liver-1-40	1-40	29	18206
1993	10	10 Liver-1-40	1-40	188	17742
1994	10	10 Liver-1-40	1-40	69	17581
1995	10	10 Liver-1-40	1-40	117	17219
1996	10	10 Liver-1-40	1-40	135	16420
1997	10	10 Liver-1-40	1-40	205	16192
1998	10	10 Liver-1-40	1-40	209	16064
1999	10	10 Liver-1-40	1-40	239	15764
[truncated: 9,310 more rows]

## Sheet: Area statistic analysis  
Group of mice	Tg♂HFHS	Ng♂HFHS	Tg♂Control	Ng♂Control
Number of mice	2,9,15,18,56	1,3,4,5,7,8	6,12,16,27,58	20,21,22
Number of mice	Liver lipid vacuoles area
1		70178
1		51039
1		45773
1		45755
1		45248
1		45078
1		44608
1		44547
1		43249
1		41473
1		39574
1		39116
1		38283
1		38125
1		37549
1		36976
1		35679
1		34425
1		33570
1		33391
1		33010
1		32770
1		32305
1		32215
1		31986
1		31983
1		31131
1		30109
1		30015
1		28698
1		27773
1		27759
1		27572
1		27011
1		26687
1		26665
1		26164
1		25817
1		25712
1		24586
1		24203
1		23833
1		23688
1		23493
1		22641
1		21852
1		20881
1		20804
1		20516
1		20441
1		19673
1		19502
1		18047
1		17914
1		17422
1		17240
1		17131
1		16553
1		16458
1		16439
1		15983
1		15874
1		15712
1		15603
1		15527
1		14994
1		14463
1		13815
1		13509
1		13493
1		13477
1		13441
1		13427
1		13180
1		12728
1		12522
1		12337
1		12300
1		11987
1		11841
1		11680
1		11609
1		11358
1		11277
1		11086
1		11046
1		10854
1		10692
1		10624
1		10470
1		10353
1		10330
1		10319
1		10265
1		10040
1		9908
1		9757
1		9739
1		9695
1		9308
1		9216
1		9192
1		9165
1		8981
1		8953
1		8766
1		8469
1		8265
1		8188
1		7536
1		7511
1		7509
1		7353
1		7179
1		7074
1		6909
1		6748
1		6576
1		6540
1		6140
1		5994
1		5924
1		5899
1		5873
1		5403
1		5217
1		5179
1		5119
1		5072
1		5058
1		5029
1		4813
1		4695
1		4577
1		4468
1		4467
1		4407
1		4315
1		4278
1		4264
1		4202
1		4108
1		4017
1		3848
1		3799
1		3736
1		3711
1		3666
1		3519
1		3500
1		3421
1		3396
1		3277
1		3264
1		3259
1		3188
1		3101
1		3095
1		3049
1		2924
1		2889
1		2787
1		2786
1		2761
1		2736
1		2707
1		2617
1		2578
1		2417
1		2373
1		2338
1		2275
1		2243
1		2188
1		2155
1		2146
1		2124
1		2122
1		2089
1		2088
1		2078
1		2045
1		1986
1		1944
1		1940
1		1938
1		1922
1		1885
1		1859
1		1858
1		1775
1		1766
1		1749
1		1730
1		1722
1		1716
1		1701
1		1679
1		1642
1		1635
1		1535
1		1523
1		1521
1		1456
1		1450
1		1428
1		1412
1		1398
1		1378
1		1366
1		1355
1		1352
1		1350
1		1342
1		1334
1		1320
1		1276
1		1268
1		1263
1		1257
1		1254
1		1250
1		1248
1		1235
1		1208
1		1206
1		1164
1		1162
1		1155
1		1153
1		1150
1		1147
1		1147
1		1138
1		1126
1		1122
1		1115
1		1111
1		1102
1		1102
1		1098
1		1075
1		1063
1		1061
1		1058
1		1056
1		1055
1		1053
1		1050
1		1049
1		1042
1		1040
1		1025
1		1021
1		1011
2	64454
2	40351
2	35899
2	32012
2	29824
2	26321
2	25017
2	24315
2	22698
2	22501
2	21981
2	20571
2	20347
2	20260
2	17473
2	16865
2	15476
2	15321
2	14648
2	14614
2	14259
2	13296
2	13062
2	13005
2	12136
2	10722
2	9445
2	9317
2	8170
2	8000
2	7578
2	6880
2	6583
2	6385
2	6127
2	6081
2	5570
2	5424
2	5312
2	4409
2	4399
2	4151
2	3840
2	3204
2	2978
2	2843
2	2834
2	2681
2	2665
2	2587
2	2569
2	2535
2	2333
2	2279
2	2201
2	2066
2	1984
2	1983
2	1936
2	1934
2	1853
2	1825
2	1707
2	1661
2	1624
2	1615
2	1604
2	1558
2	1555
2	1541
2	1533
2	1517
2	1469
2	1433
2	1395
2	1378
2	1350
2	1332
2	1303
2	1276
2	1256
2	1251
2	1248
2	1234
2	1227
2	1219
2	1195
2	1189
2	1155
2	1136
2	1115
2	1108
2	1073
2	1066
2	1059
2	1044
2	1043
2	1029
2	1022
2	1012
2	1002
2	1001
3		91403
3		79300
3		72908
3		68406
3		63545
3		61332
3		60837
3		59993
3		59721
3		59291
3		56875
3		56874
3		55578
3		55053
3		53464
3		52465
3		51830
3		51422
3		50601
3		50101
3		48669
3		48216
3		47204
3		46191
3		44893
3		43953
3		43007
3		42354
3		42072
3		41609
3		40391
3		40308
3		40132
3		39587
3		38878
3		38286
3		37120
3		37067
3		36089
3		31820
3		31793
3		31501
3		31373
3		31304
3		31107
3		30989
3		30901
3		29839
3		29612
3		29398
3		29053
3		27983
3		27499
3		26101
3		25518
3		25509
3		25364
3		24506
3		23370
3		22753
3		22308
3		22242
3		22105
3		21915
3		21888
3		21795
3		21377
3		21125
3		21030
3		20770
3		20084
3		19703
3		19528
3		19345
3		18743
3		18636
3		18346
3		18033
3		16900
3		16847
3		16808
3		16674
3		16549
3		16080
3		15975
3		15644
3		15545
3		15041
3		14894
3		14435
3		14414
3		14339
3		14215
3		14035
3		14027
3		13985
3		13922
3		13877
3		13647
3		13312
3		13258
3		12607
3		12495
3		12383
3		12171
3		12121
3		11684
3		11640
3		11588
3		11498
3		11410
3		11225
3		11106
3		11098
3		10822
3		10759
3		10715
3		10650
3		10558
3		10554
3		10519
3		10406
3		10311
3		10027
3		9836
3		9704
3		9674
3		9623
3		9251
3		9034
3		8842
3		8791
3		8776
3		8726
3		8648
3		8637
3		8544
3		8183
3		8172
3		7991
3		7955
3		7840
3		7764
3		7743
3		7671
3		7650
3		7513
3		7371
3		7371
3		7337
3		7216
3		7157
3		7131
3		7071
3		6994
3		6956
3		6910
3		6889
3		6802
3		6735
3		6683
3		6554
3		6356
3		6184
3		6071
3		5962
3		5883
3		5873
3		5794
3		5706
3		5618
3		5575
3		5490
3		5472
3		5427
3		5284
3		5228
3		5228
3		5057
3		5005
3		4832
3		4787
3		4721
3		4705
3		4637
3		4580
3		4549
3		4489
3		4453
3		4401
3		4399
3		4384
3		4311
3		4277
3		4271
3		4270
3		4268
3		4207
3		4113
3		4105
3		4066
3		4058
3		3998
3		3992
3		3990
3		3970
3		3909
3		3784
3		3770
3		3740
3		3652
3		3613
3		3608
3		3591
3		3551
3		3522
3		3513
3		3501
3		3492
3		3416
3		3394
3		3379
3		3327
3		3305
3		3296
3		3272
3		3246
3		3199
3		3166
3		3115
3		3088
3		3012
3		2945
3		2918
3		2887
3		2879
3		2879
3		2829
3		2799
3		2756
3		2752
3		2693
3		2657
3		2613
3		2612
3		2533
3		2533
3		2531
3		2456
3		2432
3		2412
3		2374
3		2361
3		2336
3		2317
3		2313
3		2284
3		2282
3		2272
3		2256
3		2253
3		2227
3		2182
3		2114
3		2106
3		2092
3		2080
3		2080
3		2060
3		2055
3		2042
3		2004
3		1985
3		1953
3		1949
3		1889
3		1877
3		1866
3		1784
3		1751
3		1677
3		1638
3		1634
3		1630
3		1619
3		1601
3		1566
3		1544
3		1527
3		1505
3		1503
3		1500
3		1477
3		1474
3		1459
3		1436
3		1435
3		1410
3		1402
3		1386
3		1366
3		1363
3		1339
3		1338
3		1336
3		1327
3		1310
3		1304
3		1304
3		1302
3		1300
3		1279
3		1274
3		1270
3		1266
3		1265
3		1263
3		1242
3		1237
3		1232
3		1229
3		1219
3		1201
3		1183
3		1170
3		1146
3		1139
3		1126
3		1118
3		1114
3		1108
3		1108
3		1104
3		1101
3		1095
3		1080
3		1067
3		1028
3		1023
3		1012
3		1010
4		65031
4		54294
4		42423
4		34099
4		29856
4		29309
4		23907
4		21256
4		19277
4		17513
4		17169
4		14474
4		13842
4		13186
4		12999
4		11839
4		9619
4		9408
4		9333
4		8723
4		8694
4		8172
4		7656
4		6308
4		5462
4		5405
4		5102
4		5047
4		4636
4		4631
4		4276
4		3887
4		3371
4		2956
4		2879
4		2870
4		2579
4		2574
4		2069
4		2001
4		1915
4		1847
4		1828
4		1783
4		1666
4		1659
4		1565
4		1518
4		1412
4		1380
4		1220
4		1192
4		1021
5		68010
5		59664
5		56633
5		45322
5		38677
5		38540
5		37842
5		36799
5		34978
5		31914
5		31704
5		31147
5		31109
5		30291
5		30215
5		29820
5		28772
5		28678
5		28632
5		26984
5		25582
5		25424
5		25357
5		24956
5		24570
5		22535
5		22528
5		21832
5		21770
5		21231
5		20552
5		20471
5		20323
5		19811
5		18584
5		18477
5		18307
5		18187
5		18127
5		16807
5		16384
5		16151
5		15446
5		15273
5		14470
5		14428
5		13671
5		13493
5		13481
5		13325
5		12917
5		12720
5		12636
5		12521
5		12469
5		12267
5		11884
5		11818
5		11569
5		11363
5		11262
5		11155
5		10747
5		10257
5		10130
5		9599
5		9412
5		9226
5		9225
5		8564
5		8489
5		8121
5		7889
5		7829
5		7419
5		7104
5		7100
5		7097
5		6948
5		6267
5		5790
5		5630
5		5337
5		4828
5		4397
5		3908
5		3684
5		3304
5		3302
5		3025
5		3013
5		2859
5		2767
5		2680
5		2672
5		2631
5		2559
5		2465
5		2447
5		2429
5		2270
5		2224
5		2119
5		2068
5		2023
5		1971
5		1954
5		1903
5		1735
5		1676
5		1459
5		1451
5		1324
5		1308
5		1275
5		1198
5		1093
5		1079
5		1005
6			7758
6			5760
6			4226
6			4121
6			3457
6			3393
6			3314
6			3257
6			3190
6			2908
6			2790
6			2741
6			2660
6			2584
6			2491
6			2470
6			2465
6			2331
6			2267
6			2264
6			2261
6			2231
6			2219
6			2217
6			2148
6			2126
6			2114
6			2107
6			2060
6			1995
6			1952
6			1949
6			1923
6			1891
6			1878
6			1847
6			1837
6			1818
6			1798
6			1773
6			1763
6			1748
6			1735
6			1717
6			1716
6			1707
6			1688
6			1672
6			1668
6			1662
6			1641
6			1622
6			1620
6			1604
6			1599
6			1598
6			1574
6			1569
6			1542
6			1534
6			1532
6			1521
6			1512
6			1505
6			1505
6			1504
6			1490
6			1487
6			1442
6			1419
6			1418
6			1401
6			1392
6			1383
6			1377
6			1348
6			1343
6			1314
6			1308
6			1293
6			1281
6			1279
6			1273
6			1270
6			1266
6			1252
6			1246
6			1243
6			1224
6			1221
6			1220
6			1214
6			1205
6			1203
6			1199
6			1193
6			1190
6			1184
6			1170
6			1169
6			1161
6			1153
6			1143
6			1139
6			1136
6			1135
6			1129
6			1128
6			1108
6			1108
6			1098
6			1097
6			1091
6			1087
6			1087
6			1081
6			1073
6			1068
6			1065
6			1059
6			1050
6			1046
6			1045
6			1034
6			1029
6			1028
6			1021
6			1014
7		29641
7		21965
7		21454
7		19952
7		19861
7		16657
7		14480
7		14479
7		12865
7		11591
7		11296
7		11234
7		11160
7		8653
7		7534
7		7190
7		7156
7		6841
7		6134
7		6024
7		5756
7		5543
7		5509
7		5142
7		5005
7		4999
7		4855
7		4826
7		4488
7		4274
7		4098
7		3884
7		3877
7		3702
7		3365
7		3318
7		3130
7		3039
7		2940
7		2733
7		2711
7		2532
7		2469
7		2403
7		2379
7		2256
7		2177
7		2157
7		2058
7		1876
7		1867
7		1810
7		1795
7		1731
7		1683
7		1494
7		1492
7		1420
7		1412
7		1380
7		1302
7		1291
7		1230
7		1199
7		1157
7		1153
7		1126
7		1114
7		1106
7		1065
7		1032
7		1029
7		1013
7		1005
9	56891
9	53785
9	52635
9	49905
9	48076
9	42810
9	39736
9	35318
9	34964
9	32066
9	31998
9	31660
9	30802
9	30609
9	30145
9	29960
9	29581
9	29329
9	28509
9	27972
9	27579
9	27217
9	27023
9	26398
9	26179
9	24631
9	24351
9	24221
9	23913
9	23786
9	22125
9	22026
9	21641
9	21016
9	20950
9	20941
9	20884
9	20414
9	19830
9	19285
9	19243
9	18944
9	18381
9	18184
9	18119
9	18115
9	18017
9	17765
9	17635
9	17626
9	17451
9	17039
9	16761
9	16382
9	16194
9	16183
9	16079
9	15961
9	15274
9	15092
9	15005
9	14977
9	14940
9	14718
9	14607
9	14595
9	14565
9	14289
9	14088
9	13972
9	13924
9	13806
9	13613
9	13491
9	13224
9	13168
9	13140
9	12863
9	12663
9	12659
9	12653
9	12538
9	12433
9	12181
9	11955
9	11771
9	11766
9	11654
9	11590
9	11497
9	11395
9	11328
9	11266
9	10743
9	10674
9	10555
9	10543
9	10189
9	10100
9	10073
9	10070
9	9622
9	9600
9	9418
9	9401
9	9361
9	9277
9	9261
9	9130
9	9106
9	9088
9	8774
9	8743
9	8733
9	8637
9	8547
9	8412
9	8255
9	8213
9	8181
9	8159
9	8098
9	7937
9	7876
9	7766
9	7709
9	7662
9	7539
9	7527
9	7139
9	7074
9	7072
9	7059
9	7058
9	7055
9	6948
9	6895
9	6884
9	6636
9	6539
9	6463
9	6460
9	6385
9	6287
9	6255
9	6212
9	5990
9	5941
9	5873
9	5515
9	5458
9	5396
9	5255
9	5236
9	5218
9	5149
9	5085
9	5017
9	4976
9	4957
9	4941
9	4894
9	4840
9	4680
9	4609
9	4515
9	4415
9	4395
9	4390
9	4293
9	4266
9	4225
9	4167
9	4157
9	4153
9	4134
9	3984
9	3924
9	3916
9	3898
9	3896
9	3839
9	3771
9	3704
9	3685
9	3661
9	3647
9	3603
9	3495
9	3494
9	3467
9	3436
9	3433
9	3346
9	3339
9	3240
9	3176
9	3160
9	3152
9	3029
9	3016
9	2985
9	2976
9	2933
9	2889
9	2855
9	2800
9	2781
9	2777
9	2777
9	2755
9	2661
9	2627
9	2583
9	2520
9	2515
9	2430
9	2409
9	2393
9	2391
9	2345
9	2337
9	2321
9	2264
9	2244
9	2206
9	2184
9	2117
9	2102
9	2092
9	2000
9	1955
9	1786
9	1756
9	1753
9	1753
9	1749
9	1643
9	1625
9	1608
9	1578
9	1533
9	1531
9	1524
9	1482
9	1479
9	1473
9	1470
9	1452
9	1399
9	1398
9	1381
9	1359
9	1358
9	1357
9	1356
9	1330
9	1329
9	1298
9	1289
9	1278
9	1269
9	1265
9	1250
9	1235
9	1170
9	1160
9	1142
9	1141
9	1136
9	1135
9	1129
9	1104
9	1102
9	1074
9	1073
9	1061
9	1059
9	1037
9	1022
9	1020
12			75472
12			69955
12			57818
12			55224
12			53253
12			51153
12			49942
12			47482
12			45574
12			44463
12			43096
12			41976
12			40751
12			39462
12			38063
12			37338
12			35937
12			35833
12			35415
12			35362
12			35360
12			35071
12			34407
12			32819
12			32411
12			31594
12			31558
12			29978
12			29445
12			29403
12			29397
12			29392
12			28742
12			28583
12			28486
12			28303
12			27965
12			27687
12			26818
12			26238
12			25439
12			25405
12			23976
12			23709
12			23586
12			23199
12			22763
12			22745
12			22651
12			22458
12			22401
12			22100
12			21701
12			21517
12			21415
12			20830
12			20641
12			20637
12			20399
12			20236
12			20208
12			19955
12			19680
12			19410
12			19053
12			18762
12			18258
12			17636
12			17513
12			17293
12			17192
12			17099
12			17081
12			16420
12			16367
12			16363
12			16007
12			15472
12			15448
12			15216
12			15099
12			14974
12			14750
12			14613
12			14476
12			14013
12			13995
12			13895
12			13818
12			13699
12			13380
12			13159
12			13084
12			13064
12			12981
12			12921
12			12886
12			12787
12			12774
12			12593
12			12555
12			12545
12			12514
12			12513
12			12242
12			12153
12			12009
12			11962
12			11926
12			11736
12			11607
12			11485
12			11426
12			11370
12			11266
12			11056
12			10978
12			10891
12			10743
12			10624
12			10488
12			10368
12			10317
12			10230
12			10226
12			10129
12			9880
12			9817
12			9808
12			9778
12			9660
12			9490
12			9452
12			9334
12			9331
12			9023
12			9016
12			8947
12			8793
12			8543
12			8392
12			8353
12			8345
12			8222
12			8194
12			7867
12			7835
12			7784
12			7769
12			7714
12			7663
12			7632
12			7626
12			7616
12			7572
12			7487
12			7440
12			7315
12			7306
12			7176
12			7167
12			6892
12			6782
12			6442
12			6209
12			6205
12			6191
12			6155
12			5987
12			5904
12			5668
12			5640
12			5601
12			5589
12			5444
12			5381
12			5260
12			5204
12			5071
12			4988
12			4825
12			4771
12			4649
12			4620
12			4574
12			4521
12			4510
12			4487
12			4459
12			4244
12			4240
12			4170
12			4050
12			3981
12			3947
12			3902
12			3763
12			3722
12			3468
12			3415
12			3340
12			3255
12			3232
12			3204
12			3046
12			2997
12			2902
12			2823
12			2818
12			2719
12			2689
12			2689
12			2669
12			2643
12			2641
12			2566
12			2334
12			2330
12			2325
12			2280
12			2213
12			2202
12			2161
12			2157
12			2099
12			2093
12			2047
12			2037
12			1998
12			1977
12			1949
12			1838
12			1807
12			1760
12			1745
12			1720
12			1636
12			1599
12			1518
12			1437
12			1391
12			1331
12			1329
12			1311
12			1255
12			1243
12			1227
12			1224
12			1216
12			1197
12			1149
12			1129
12			1076
12			1060
12			1048
15	94482
15	94473
15	75359
15	67799
15	65122
15	63243
15	60544
15	60297
15	60224
15	57442
15	57295
15	55151
15	52527
15	51072
15	50482
15	50431
15	50009
15	49477
15	48922
15	46807
15	43468
15	42924
15	40884
15	40554
15	39686
15	38002
15	37313
15	36987
15	36576
15	36397
15	35993
15	35343
15	34952
15	34907
15	34310
15	33563
15	33136
15	32222
15	31905
15	31565
15	29352
15	27029
15	26741
15	26656
15	26456
15	26350
15	25676
15	25504
15	25410
15	23871
15	23824
15	23482
15	22864
15	22655
15	22572
15	21904
15	21272
15	20817
15	19081
15	18761
15	18480
15	18283
15	17820
15	17733
15	17578
15	17535
15	17494
15	17376
15	16893
15	16792
15	16502
15	16185
15	15268
15	15246
15	13990
15	13594
15	13183
15	13151
15	13062
15	12717
15	12662
15	11966
15	11924
15	11582
15	11489
15	11152
15	10939
15	10899
15	10138
15	9511
15	9375
15	9349
15	9192
15	9030
15	8554
15	8509
15	8472
15	8264
15	8246
15	7222
15	7191
15	7007
15	6393
15	5832
15	4346
15	3498
15	3480
15	3122
15	3086
15	3052
15	2853
15	2502
15	2401
15	2205
15	2122
15	2086
15	1903
15	1773
15	1695
15	1670
15	1658
15	1657
15	1576
15	1564
15	1548
15	1492
15	1474
15	1466
15	1432
15	1412
15	1313
15	1283
15	1248
15	1217
15	1205
15	1202
15	1168
15	1129
15	1123
15	1095
15	1074
15	1035
16			47895
16			46134
16			44817
16			42895
16			40956
16			40794
16			40438
16			39675
16			39094
16			38622
16			38259
16			38155
16			37752
16			37673
16			36768
16			36390
16			35888
16			33834
16			32736
16			32220
16			30581
16			29954
16			29557
16			29431
16			29354
16			28544
16			27795
16			26468
16			26238
16			25927
16			25906
16			25762
16			25184
16			24216
16			23883
16			23335
16			22358
16			21942
16			21807
16			21768
16			21285
16			19864
16			19173
16			19000
16			18968
16			18916
16			18475
16			17991
16			17526
16			17189
16			16792
16			16536
16			16144
16			15798
16			14975
16			14488
16			14282
16			14063
16			14019
16			13944
16			13722
16			13667
16			13601
16			13542
16			13405
16			13005
16			12644
16			12041
16			11954
16			11950
16			11833
16			11786
16			11483
16			11424
16			11250
16			11219
16			11100
16			11087
16			11075
16			10865
16			10861
16			10855
16			10819
16			10792
16			10790
16			10605
16			10577
16			10402
16			10335
16			10285
16			10197
16			9483
16			9321
16			9217
16			9122
16			8959
16			8745
16			8631
16			8258
16			8019
16			7757
16			7679
16			7386
16			6806
16			6709
16			6256
16			6030
16			5838
16			5810
16			5781
16			5668
16			5609
16			5553
16			5448
16			5369
16			5328
16			5300
16			5123
16			4629
16			4554
16			4379
16			4309
16			4197
16			4185
16			4159
16			4148
16			4129
16			4063
16			4062
16			3850
16			3736
16			3670
16			3585
16			3578
16			3469
16			3459
16			3339
16			3189
16			3145
16			3084
16			3037
16			2814
16			2788
16			2753
16			2670
16			2628
16			2578
16			2538
16			2458
16			2328
16			2285
16			2228
16			2064
16			2023
16			1958
16			1892
16			1750
16			1690
16			1602
16			1537
16			1511
16			1425
16			1415
16			1382
16			1358
16			1358
16			1354
16			1349
16			1318
16			1317
16			1312
16			1303
16			1281
16			1277
16			1227
16			1160
16			1139
16			1099
16			1096
16			1079
16			1062
16			1032
16			1029
16			1018
16			1017
18	39143
18	32421
18	31047
18	27744
18	27314
18	26638
18	25868
18	25551
18	24742
18	22994
18	20334
18	19274
18	19229
18	18792
18	17480
18	16830
18	16535
18	15412
18	15063
18	14760
18	14610
18	14383
18	14109
18	13499
18	12964
18	12451
18	12374
18	12124
18	11855
18	11855
18	11488
18	10546
18	10275
18	10259
18	9763
18	9687
18	9470
18	9255
18	8753
18	8690
18	8590
18	8569
18	8569
18	8551
18	8305
18	7836
18	7783
18	7761
18	7564
18	7540
18	7483
18	7403
18	7245
18	6911
18	6364
18	6352
18	6236
18	6217
18	6146
18	6057
18	6047
18	5951
[truncated: 1,780 more rows]
