# Supplementary material for: Kill two birds with one stone: making multi-transgenic pre-diabetes mouse models through insulin resistance and pancreatic apoptosis pathogenesis
Source: PeerJ. 2018 Apr 17;6:e4542. doi: 10.7717/peerj.4542 (PMC5909684; doi:10.7717/peerj.4542)
Supplement: Supplemental Information 6 [file peerj-06-4542-s007.xlsx]

## Sheet: Islet Area
Mouse Number	Tissue Section Number	Picture Number	Coordinate	Area(piexls)
1	1 Pancreas-1-20	1-1-20	1	519337
1	1 Pancreas-1-20	1-1-20	2	875483
2	2 Pancreas-1-20	2-1-20	1	601078
3	3 Pancreas-1-20	3-1-20	1	2264036
3	3 Pancreas-1-20	3-1-20	2	822148
3	3 Pancreas-1-20	3-1-20	3	468214
5	5 Pancreas-1-20	5-1-20	1	619058
5	5 Pancreas-1-20	5-1-20	4	390985
5	5 Pancreas-1-20	5-1-20	2	248680
5	5 Pancreas-1-20	5-1-20	6	66179
5	5 Pancreas-1-20	5-1-20	3	37932
5	5 Pancreas-1-20	5-1-20	5	36499
6	6 Pancreas-1-20	6-1-20	2	270051
6	6 Pancreas-1-20	6-1-20	1	268642
11	11 Pancreas-1-20	11-1-20	3	898039
11	11 Pancreas-1-20	11-1-20	1	884196
11	11 Pancreas-1-20	11-1-20	6	712835
11	11 Pancreas-1-20	11-1-20	7	125195
11	11 Pancreas-1-20	11-1-20	2	101979
11	11 Pancreas-1-20	11-1-20	4	24402
12	12 Pancreas-1-20	12-1-20	2	663495
12	12 Pancreas-1-20	12-1-20	1	123035
13	13 Pancreas-1-20	13-1-20	1	641353
14	14 Pancreas-1-20	14-1-20	2	107864
14	14 Pancreas-1-20	14-1-20	1	64583
15	15 Pancreas-1-20	15-1-20	1	1283007
17	17 Pancreas-1-20	17-1-20	1	75314
17	17 Pancreas-1-20	17-1-20	3	20159
17	17 Pancreas-1-20	17-1-20	2	13006
18	18 Pancreas-1-20	18-1-20	1	2789247
20	20 Pancreas-1-20	20-1-20	1	525318
21	21 Pancreas-1-20	21-1-20	2	884051
21	21 Pancreas-1-20	21-1-20	1	81806
23	23 Pancreas-1-20	23-1-20	1	859641
23	23 Pancreas-1-20	23-1-20	5	740481
23	23 Pancreas-1-20	23-1-20	2	317163
23	23 Pancreas-1-20	23-1-20	7	146418
23	23 Pancreas-1-20	23-1-20	6	54823
23	23 Pancreas-1-20	23-1-20	4	12682
23	23 Pancreas-1-20	23-1-20	3	10631
24	24 Pancreas-1-20	24-1-20	1	44770
24	24 Pancreas-1-20	24-1-20	2	30086
24	24 Pancreas-1-20	24-1-20	3	9725
25	25 Pancreas-1-20	25-1-20	2	570436
25	25 Pancreas-1-20	25-1-20	1	24390
26	26 Pancreas-1-20	26-1-20	1	1669938
26	26 Pancreas-1-20	26-1-20	3	165773
26	26 Pancreas-1-20	26-1-20	2	127350
27	27 Pancreas-1-20	27-1-20	2	170014
27	27 Pancreas-1-20	27-1-20	1	12385
29	29 Pancreas-1-20	29-1-20	1	657245
29	29 Pancreas-1-20	29-1-20	2	541163
30	30 Pancreas-1-20	30-1-20	1	708917
47	47 Pancreas-1-20	47-1-20	4	758129
47	47 Pancreas-1-20	47-1-20	1	419522
47	47 Pancreas-1-20	47-1-20	2	264144
47	47 Pancreas-1-20	47-1-20	5	220939
47	47 Pancreas-1-20	47-1-20	3	220755
49	49 Pancreas-1-20	49-1-20	2	548217
49	49 Pancreas-1-20	49-1-20	3	181812
49	49 Pancreas-1-20	49-1-20	1	149887
55	55 Pancreas-1-20	55-1-20	1	109754
56	56 Pancreas-1-20	56-1-20	1	6415333
56	56 Pancreas-1-20	56-1-20	5	494559
56	56 Pancreas-1-20	56-1-20	4	323367
56	56 Pancreas-1-20	56-1-20	3	191606
56	56 Pancreas-1-20	56-1-20	2	9489
58	58 Pancreas-1-20	58-1-20	1	99158
58	58 Pancreas-1-20	58-1-20	2	52288
62	62 Pancreas-1-20	62-1-20	1	57261
			Maximum	6415333
			Count	70
			Minimum	9489
			Average	498535
Group	Mouse Number	Total islet area	Islet numbers	Section numbers	Picture Number	Average area(piexls)
Tg HFHSD	2	601078	1	1	1	601078
	15	1283007	1	1	1	1283007
	18	2789247	1	1	1	2789247
	56	7434354	5	1	1	1.48687e+06
					Average	1.54005e+06
Nc HFHSD	1	1394820	2	1	1	697410
	3	3554398	3	1	1	1.1848e+06
	5	1399333	6	1	1	233222
					Average	705144
Tg ControlD	6	538693	2	1	1	269346
	12	786530	2	1	1	393265
	27	182399	2	1	1	91199.5
	58	151446	2	1	1	75723
					Average	207384
Nc ControlD	20	525318	1	1	1	525318
	21	965857	2	1	1	482928
					Average	504123
					T.TEST	0.0304097

## Sheet: Insulin IOD 
Mouse Number	Tissue Section Number	IOD(Sum)	Area(Sum)	Avg IOD
1	1 insulin 200x	3042.54	22467	0.135423
2	2 insulin 200x	2915.02	276618	0.0105381
2	2 insulin 200x（2）	9839745	149113	65.9885
2	2 Ins 200 2	19362.3	83523	0.23182
3	3 insulin 200x	11693.8	61757	0.189352
5	5 INS 200 2	14082010	249687	56.3987
6	6 Ins 200 1	124605	778546	0.160049
12	12 Ins 200 1	59725.7	360154	0.165834
12	12 insulin 200x（2）	16587	173497	0.0956039
12	12 insulin 200x	12883.7	153047	0.0841811
16	16 insulin 200x(2)	6195.94	66813	0.0927356
16	16 insulin 200x(3)	4567.07	36104	0.126497
16	16 insulin 200x	4.26917e+06	66984	63.7342
21	21 insulin 200x(2)	6.12924e+06	69918	87.6633
21	21 insulin 200x	7346064	86329	85.0938
22	22 insulin 200x	3116593	28306	110.104
Group	Tg HFHSD	Nc HFHSD	Tg ControlD	Nc ControlD
Mouse Number	2,9,15,18,56，	1,3,4,5,7,8	6,12,16,27,58	20,21,22
1		0.135423
2	0.0105381
2	65.9885
2	0.23182
3		0.189352
5		56.3987
6			0.160049
12			0.165834
12			0.0956039
12			0.0841811
16			0.0927356
16			0.126497
16			63.7342
21				87.6633
21				85.0938
22				110.104
Average	22.077	18.9078	9.20844	94.2869
T.Test(vs Nc♂Control)	0.0182393	0.0103948	0.000248612

## Sheet: IAPP IOD
Mouse Number	Tissue Section Number	IOD(Sum)	Area(Sum)	Avg IOD
2	2 Iapp 200 1	186976	651537	0.286976
2	2 iapp 200x(2)	35627.2	340099	0.104755
2	2 iapp 200x(3)	37712.2	333865	0.112956
2	2 iapp 200x	22371.5	143883	0.155484
3	3 Iapp 200 1	67527	173680	0.388801
3	3 Iapp 200 2	56451	158026	0.357226
5	5 iapp 200x(2)	7233.76	49884	0.145012
5	5 iapp 200x	17454.2	133994	0.130261
12	12 Iapp 200 1	116606	355703	0.327819
14	14 Iapp 200 1	158900	444321	0.357623
16	16 iapp 200x	24858.7	123426	0.201406
18	18 Iapp 200 1	66886.6	117486	0.569316
21	21 Iapp 200 1	225416	679924	0.33153
22	22 Iapp 200 1	85525.2	275034	0.310962
22	22 Iapp 200 2	36884.9	115208	0.320159
24	24 iapp 200x(2)	1694.17	6811	0.24874
24	24 iapp 200x	3050.39	12505	0.243933
29	29 Iapp 200 1	111209	295590	0.376228
Group	Tg HFHSD	Nc HFHSD	Tg ControlD	Nc ControlD
Mouse Number	2,9,15,18,56，	1,3,4,5,7,8	6,12,16,27,58	20,21,22
2	0.286976
2	0.104755
2	0.112956
2	0.155484
3		0.388801
3		0.357226
5		0.145012
5		0.130261
12			0.327819
14
16			0.201406
18	0.569316
21				0.33153
22				0.310962
22				0.320159
24
24
29
Average	0.245897	0.255325	0.264612	0.320884

## Sheet: Caspase 3 IOD 
Mouse Number	Tissue Section Number	IOD(Sum)	Area(Sum)	Avg IOD
2	2 C3 200x(2)	4642.67	151270	0.0306913
2	2 C3 200x	13700.9	275525	0.0497264
2	2 c3 200	28914.1	217558	0.132903
3	3 C3 200x(2)	838.207	90387	0.00927353
3	3 C3 200x(3)	0	43620	0
3	3 C3 200x(4)	99.3068	71168	0.00139539
5	5 C3 200x(2)	15092.5	129362	0.116669
5	5 C3 200x	21.8155	57284	0.000380831
6	6 c3 200	224136	1257072	0.1783
11	11 C3 200 1	77747.4	397780	0.195453
14	14 C3 200x	6098.86	80428	0.0758301
16	16 c3 200x(2)	1921.89	40303	0.047686
16	16 C3 200x(3)	4135.03	65707	0.0629313
16	16 c3 200x(4)	7900.14	72148	0.109499
16	16 c3 200x	2314.87	31154	0.0743041
18	18 C3 200x	0	12723	0
21	21 C3 200x(2)	324.077	91745	0.00353237
21	21 C3 200x	8407.38	185898	0.0452258
22	22 C3 200x(2)	3071.24	65948	0.0465706
22	22 C3 200x	1786.67	27449	0.0650905
24	24 C3 200x(2)	1927.68	14138	0.136347
24	24 C3 200x	977.969	5352	0.18273
29	29 C3 200x(1)	1934.53	76618	0.025249
29	29 C3 200x(2)	812.346	44845	0.0181145
46	46 c3 200 1	13424	43066	0.311708
50	50 c3 200 1	44013.2	476226	0.0924209
70	70 c3 200 1	35267.4	339844	0.103775
96	96 C3 200 1	34033.9	297381	0.114446
Group	Tg HFHSD	Nc HFHSD	Tg ControlD	Nc ControlD
Mouse Number	2,9,15,18,56，	1,3,4,5,7,8	6,12,16,27,58	20,21,22
2	0.0306913
2	0.0497264
2	0.132903
3		0.00927353
3		0.00139539
5		0.116669
5		0.000380831
6			0.1783
16			0.047686
16			0.0629313
16			0.109499
16			0.0743041
21				0.00353237
21				0.0452258
22				0.0465706
22				0.0650905
Average	0.0711068	0.0319296	0.094544	0.0401048
