# Supplementary material for: Kill two birds with one stone: making multi-transgenic pre-diabetes mouse models through insulin resistance and pancreatic apoptosis pathogenesis
Source: PeerJ. 2018 Apr 17;6:e4542. doi: 10.7717/peerj.4542 (PMC5909684; doi:10.7717/peerj.4542)
Supplement: Supplemental Information 7 [file peerj-06-4542-s008.xlsx]

## Sheet: Table 1
Serological parameters of mouse models related to pre-diabetes
		GLU	HDL-C	LDL-C	COR	TG	INS	C-P
Group	Number of mouse	mmol/L	mmoI/L	mmoI/L	ng/ml	mmoI/L	uIU/ml	mmol/l
Tg HFHSD	2	6.58	1.58	0.57	10.36	0.16	22.68	1.24
	9	1.47	0.52	0.44	24	1.92	19.86	1.11
	15	7.23	1.73	0.36	9.15	0.13	5.24	0.48
	18	8.88	1.92	0.47	3.71	0.14	13.7	0.69
	56	4.9	1.71	0.22	8.85	0.26	34.9	0.53
Average		5.812	1.492	0.412	11.214	0.522	19.276	0.81
SDV		2.81504	0.556749	0.131034	7.58897	0.783211	11.0016	0.345181
SEM		1.25893	0.248986	0.0586003	3.39389	0.350263	4.92005	0.15437
T-test(TgHFHSD vs NcHFHSD)		0.0850593	0.057991	0.0934959	0.453334	0.211396	0.207147	0.162089
Group	Number of mouse	GLU	HDL-C	LDL-C	COR	TG	INS	C-P
Nc HFHSD	1	2.83	2.32	0.55	9.5	0.17	12.06	0.69
	3	2.01	2.01	0.81	15.43	0.11	14.63	0.72
	5	n/a	2.02	0.4	6.92	0.08	13.82	2.77
Average		2.42	2.11667	0.586667	10.6167	0.12	13.5033	1.39333
SDV		0.579828	0.176163	0.207445	4.36351	0.0458258	1.31394	1.19232
SEM		0.41	0.101708	0.119768	2.51927	0.0264575	0.758603	0.688388
Group	Number of mouse	GLU	HDL-C	LDL-C	COR	TG	INS	C-P
Tg ControlD	6	3.38	1.65	0.22	21.56	0.28	13.4	0.59
	12	6.26	1.87	0.75	12.61	0.22	7.88	1.12
	16	3.86	1.54	1.18	3.3	0.09	18.31	0.68
	27	5.92	1.79	1.32	8.41	0.05	15.12	0.59
	58	7.59	1.38	0.13	14.45	0.23	9.71	0.58
Average		5.402	1.646	0.72	12.066	0.174	12.884	0.712
SDV		1.75058	0.195525	0.540971	6.82504	0.0986408	4.17797	0.231668
SEM		0.782882	0.0874414	0.24193	3.05225	0.0441135	1.86844	0.103605
T-test(TgControlD vs NcControlD)		0.0699582	0.00302458	0.257654	0.0658783	0.0863772	0.0320807	0.418206
		0.439995	0.192423	0.0802046	0.00504191	0.0577933	0.400742	0.0223127
Group	Number of mouse	GLU	HDL-C	LDL-C	COR	TG	INS	C-P
Nc ControlD	20	0.11	2.15	0.54	2.08	0.09	17.94	0.97
	21	0.63	2.07	0.45	6.69	0.11	18.6	0.61
	22	6.33	2.22	0.5	5.49	0.04	19.12	0.66
Average		2.35667	2.14667	0.496667	4.75333	0.08	18.5533	0.746667
SDV		3.45082	0.0750555	0.0450925	2.39166	0.0360555	0.591383	0.195021
SEM		1.99233	0.0433333	0.0260342	1.38083	0.0208167	0.341435	0.112596
